# Supplementary material for: Glycine in a basket: protonated complexes of 1,1,n,n-tetramethyl[n](2,11)teropyrenophane (n = 7, 8, 9) with glycine in the gas-phase
Source: Royal Society of Chemistry journal article supplement (doi:10.1039/d3cp00781b), 2023-01-01
Supplement: d3cp00781b1.pdf [file d3cp00781b1.pdf]

Supplementary Tables

**Table S1.** Experimental PAs of the most stable conformers of benzene, toluene, naphthalene and 1-methylnaphthalene. All values of energy are listed in kJ mol<sup>-1</sup> at 298 K and 1 atm

|                     | experimental <sup>a</sup> | B3LYP-D3<br>/ 6-311++G(d,p) | B3LYP-D3<br>/ 6-31+G(d,p) |
|---------------------|---------------------------|-----------------------------|---------------------------|
| benzene             | 750.4                     | 762.3 <sup>b</sup>          | 773.2                     |
| toluene             | 784.0                     | 802.8 <sup>c</sup>          | 803.0                     |
| naphthalene         | 802.9                     | 820.9 <sup>b</sup>          | 825.5                     |
| 1-methylnaphthalene | 834.8                     | 832.3                       | 835.9                     |

a Experimental PA values from ref. 64. b Computed PA values from ref. 65. c Computed PA values from ref. 66.

**Table S2.** Computational proton affinities (kJ mol<sup>-1</sup>) of TMnTP (n=7-9) at aromatic carbons under B3LYP-D3/6-31+G(d,p)

| Protonation Position |      | TM7TP | TM8TP | TM9TP |
|----------------------|------|-------|-------|-------|
| 1                    | -    | 971.5 | 975.7 | 979.1 |
| 2                    | exo  | 888.6 | 897.6 | 898.1 |
|                      | endo | 843.1 | 839.7 | 833.3 |
| 3                    | -    | 963.9 | 967.5 | 971.6 |
| 3a                   | exo  | 855.9 | 854.4 | 851.7 |
|                      | endo | 823.6 | 822.5 | 822.2 |
| 4                    | -    | 950.1 | 952.3 | 954.7 |
| 5                    | -    | 905.8 | 904.2 | 901.5 |
| 5a                   | exo  | 947.0 | 943.6 | 941.6 |
|                      | endo | 861.9 | 867.8 | 874.2 |
| 5b                   | exo  | 946.0 | 937.9 | 927.4 |
|                      | endo | 859.3 | 862.9 | 864.7 |
| 6                    | -    | 945.0 | 941.3 | 939.7 |
| 16                   | -    | 945.0 | 943.4 | 939.6 |
| 16a                  | exo  | 946.4 | 935.9 | 927.8 |
|                      | endo | 859.3 | 861.1 | 864.6 |
| 16b                  | exo  | 899.2 | 889.7 | 854.5 |
|                      | endo | 809.9 | 815.2 | 820.1 |
| 17                   | -    | 902.4 | 900.0 | 898.4 |
| 18                   | -    | 951.5 | 954.8 | 956.1 |
| 18a                  | exo  | 849.4 | 848.0 | 845.7 |
|                      | endo | 820.1 | 819.3 | 819.5 |
| 18b                  | exo  | 860.7 | 861.1 | 861.2 |
|                      | endo | 819.6 | 821.7 | 825.9 |
| 18c                  | exo  | 884.6 | 877.8 | 871.3 |
|                      | endo | 821.3 | 822.1 | 823.6 |
| 18d                  | exo  | 947.7 | 946.9 | 942.9 |
|                      | endo | 863.3 | 870.1 | 875.6 |

**Table S3.** Rate constants of [(TMnTP)(Gly)]H<sup>+</sup> (n=7, 8, 9), at the temperature (T) ranging from 329 K to 371K, the unit of all rate constant values is s<sup>-1</sup> and all temperature listed are in K

| [(TM7TP)(Gly)]H <sup>+</sup> |             |                    | [(TM8TP)(Gly)]H <sup>+</sup> |             |                    | [(TM9TP)(Gly)]H <sup>+</sup> |             |                    |
|------------------------------|-------------|--------------------|------------------------------|-------------|--------------------|------------------------------|-------------|--------------------|
| T                            | FD          | SD                 | T                            | FD          | SD                 | T                            | FD          | SD                 |
| / K                          |             | × 10 <sup>-2</sup> | / K                          |             | × 10 <sup>-2</sup> | / K                          |             | × 10 <sup>-2</sup> |
| 334.8                        | 0.37 ± 0.03 | 0.12 ± 0.006       | 330.0                        | 0.23 ± 0.01 | 0.25 ± 0.004       | 328.9                        | 0.36 ± 0.03 | 0.97 ± 0.02        |
| 341.6                        | 0.47 ± 0.02 | 0.18 ± 0.004       | 335.3                        | 0.44 ± 0.05 | 0.35 ± 0.03        | 342.2                        | 0.75 ± 0.08 | 2.83 ± 0.23        |
| 353.3                        | 0.79 ± 0.04 | 0.72 ± 0.03        | 354.1                        | 0.71 ± 0.02 | 1.74 ± 0.03        | 350.9                        | 1.02 ± 0.07 | 3.71 ± 0.14        |
| 356.7                        | 0.83 ± 0.02 | 0.65 ± 0.02        | 356.7                        | 1.02 ± 0.10 | 2.95 ± 0.20        | 357.0                        | 1.47 ± 0.13 | 9.02 ± 0.55        |
| 363.9                        | 1.30 ± 0.07 | 1.52 ± 0.03        | 364.9                        | 1.22 ± 0.04 | 3.31 ± 0.08        | 370.6                        | 3.20 ± 0.35 | 14.18 ± 0.65       |

**Table S4.** Natural energy decomposition analysis (NEDA) components in  $\text{kJ mol}^{-1}$  under B3LYP-D3/6-31+G(d,p)

| complex              | <i>endo</i> -(TMnTP)( GlyH <sup>+</sup> ) |         |         | <i>endo</i> -(TMnTPH <sup>+</sup> )(Gly) |         |         | <i>exo</i> -(TMnTP)( GlyH <sup>+</sup> ) |         |         | <i>exo</i> -(TMnTPH <sup>+</sup> )(Gly) |        |        |        |
|----------------------|-------------------------------------------|---------|---------|------------------------------------------|---------|---------|------------------------------------------|---------|---------|-----------------------------------------|--------|--------|--------|
|                      | n                                         | 7       | 8       | 9                                        | 7       | 8       | 9                                        | 7       | 8       | 9                                       | 7      | 8      | 9      |
| E <sub>tot</sub>     |                                           | -183.97 | -197.97 | -199.30                                  | -77.40  | -82.62  | -84.78                                   | -131.48 | -135.41 | -136.58                                 | -53.09 | -51.89 | -51.40 |
| ES                   |                                           | -70.68  | -94.50  | -85.84                                   | -61.69  | -56.04  | -56.87                                   | -66.63  | -67.09  | -67.28                                  | -51.70 | -51.63 | -49.90 |
| POL                  |                                           | -460.20 | -598.47 | -571.57                                  | -215.13 | -235.44 | -237.59                                  | -386.44 | -385.78 | -389.49                                 | -87.66 | -88.96 | -76.71 |
| XC                   |                                           | -241.25 | -316.68 | -296.20                                  | -197.72 | -231.76 | -225.10                                  | -148.16 | -138.00 | -138.54                                 | -56.77 | -56.32 | -52.06 |
| CT                   |                                           | -2.00   | -1.69   | -1.54                                    | -1.57   | -1.75   | -1.35                                    | -2.22   | -1.67   | -1.31                                   | -1.16  | -1.10  | -1.21  |
| DEF <sub>host</sub>  |                                           | 418.58  | 559.25  | 528.60                                   | 176.76  | 204.89  | 206.46                                   | 368.49  | 365.92  | 367.10                                  | 45.84  | 46.74  | 36.21  |
| DEF <sub>guest</sub> |                                           | 171.85  | 254.11  | 227.25                                   | 221.97  | 237.48  | 229.66                                   | 103.47  | 91.20   | 92.94                                   | 98.36  | 99.37  | 92.28  |
| SE <sub>host</sub>   |                                           | 194.20  | 247.01  | 238.11                                   | 56.87   | 65.76   | 68.16                                    | 173.54  | 175.82  | 177.29                                  | 14.98  | 15.46  | 12.04  |
| SE <sub>guest</sub>  |                                           | 40.63   | 56.79   | 52.01                                    | 52.81   | 53.56   | 52.92                                    | 25.71   | 22.87   | 23.37                                   | 29.84  | 30.02  | 27.11  |
| EL                   |                                           | -296.06 | -389.15 | -367.28                                  | -167.15 | -172.17 | -173.39                                  | -253.81 | -254.18 | -256.11                                 | -94.54 | -95.11 | -87.46 |
| CT                   |                                           | -2.00   | -1.69   | -1.54                                    | -1.57   | -1.75   | -1.35                                    | -2.22   | -1.67   | -1.31                                   | -1.16  | -1.10  | -1.21  |
| CORE                 |                                           | 114.08  | 192.87  | 169.52                                   | 91.33   | 91.29   | 89.96                                    | 124.55  | 120.44  | 120.83                                  | 42.61  | 44.31  | 37.28  |

**Table S5.** Relative enthalpies and Gibbs energies (in parentheses) of the lowest energy *endo*-(TMnTP)(GlyH<sup>+</sup>), *endo*-(TMnTPH<sup>+</sup>)(Gly), *exo*-(TMnTP)(GlyH<sup>+</sup>), and *exo*-(TMnTPH<sup>+</sup>)(Gly) structures at the B3LYP-D3/6-31+G(d,p) and wB97xD/6-31+G(d,p) levels and basis set.

| Species                                  | B3LYP/6-31+G(d,p) | wB97xD/6-31+G(d,p) |
|------------------------------------------|-------------------|--------------------|
| <i>endo</i> -(TM7TP)(GlyH <sup>+</sup> ) | 0.0 (0.0)         | 0.0 (0.0)          |
| <i>endo</i> -(TM7TPH <sup>+</sup> )(Gly) | 24.9 (27.0)       | 44.9 (47.3)        |
| <i>exo</i> -(TM7TPH <sup>+</sup> )(Gly)  | 48.4 (30.5)       | 72.8 (53.6)        |
| <i>exo</i> -(TM7TP)(GlyH <sup>+</sup> )  | 51.6 (45.9)       | 59.5 (51.0)        |
| <i>endo</i> -(TM8TP)(GlyH <sup>+</sup> ) | 0.0 (0.0)         | 0.0 (0.0)          |
| <i>endo</i> -(TM8TPH <sup>+</sup> )(Gly) | 26.3 (20.4)       | 41.9 (36.5)        |
| <i>exo</i> -(TM8TPH <sup>+</sup> )(Gly)  | 57.9 (31.2)       | 80.4 (50.6)        |
| <i>exo</i> -(TM8TP)(GlyH <sup>+</sup> )  | 63.5 (48.3)       | 69.5 (46.6)        |
| <i>endo</i> -(TM9TP)(GlyH <sup>+</sup> ) | 0.0 (0.0)         | 0.0 (0.0)          |
| <i>endo</i> -(TM9TPH <sup>+</sup> )(Gly) | 26.5 (24.8)       | 40.6 (35.6)        |
| <i>exo</i> -(TM9TPH <sup>+</sup> )(Gly)  | 57.0 (30.5)       | 78.5 (49.7)        |
| <i>exo</i> -(TM9TP)(GlyH <sup>+</sup> )  | 64.3 (46.1)       | 70.9 (52.3)        |

***Coordinates of the lowest-energy TMnTP/Glycine/H<sup>+</sup> complex types***

**endo-(TM7TP)(GlyH<sup>+</sup>)**

|   |             |             |             |
|---|-------------|-------------|-------------|
| C | -4.17939534 | 1.70117786  | 0.32294321  |
| C | -4.05817810 | 1.06605434  | -0.92421518 |
| H | -4.09146754 | 1.65129279  | -1.83702614 |
| C | -3.77565667 | -0.30392687 | -1.03827103 |
| C | -3.59266616 | -1.07869338 | 0.14699166  |
| C | -3.90868294 | -0.48776848 | 1.40354926  |
| C | -4.19810849 | 0.88720189  | 1.46423205  |
| H | -4.35986880 | 1.32228518  | 2.44374432  |
| C | -3.50085326 | -0.93623799 | -2.30530754 |
| H | -3.77601501 | -0.41709587 | -3.21867107 |
| C | -2.82441203 | -2.11903504 | -2.36244041 |
| H | -2.56450332 | -2.53500624 | -3.32937701 |
| C | -2.33298360 | -2.75289541 | -1.16053738 |
| C | -2.86604280 | -2.31426490 | 0.09298240  |
| C | -2.43073063 | -2.90591396 | 1.31960328  |
| C | -3.05635100 | -2.46411023 | 2.54219008  |
| H | -2.88172777 | -3.01328894 | 3.46025542  |
| C | -3.76110013 | -1.29790074 | 2.58438014  |
| H | -4.15041028 | -0.92658388 | 3.52811401  |
| C | -1.12429744 | -3.50130420 | -1.15618542 |
| C | -0.47039911 | -3.71061690 | 0.09569227  |
| C | -1.20247533 | -3.62327888 | 1.31803034  |
| C | -0.34869732 | -3.75231589 | -2.34966629 |
| H | -0.85021425 | -3.90225507 | -3.29963859 |
| C | 1.01309681  | -3.69797838 | -2.30449445 |
| H | 1.58521989  | -3.80222281 | -3.22000746 |
| C | 1.68243639  | -3.37038958 | -1.06620057 |
| C | 0.96899152  | -3.62993705 | 0.14170176  |
| C | 1.59403232  | -3.43290550 | 1.40818302  |
| C | 0.86145189  | -3.85993742 | 2.57563396  |
| H | 1.37998363  | -4.00541209 | 3.51685473  |
| C | -0.49613981 | -3.95861047 | 2.53137616  |
| H | -1.04847638 | -4.18272183 | 3.43688281  |
| C | 2.80575116  | -2.50211377 | -1.00931592 |
| C | 3.15245054  | -1.94070532 | 0.25882189  |
| C | 2.69755575  | -2.53987227 | 1.47407318  |
| C | 3.36462189  | -1.89021440 | -2.19157729 |
| H | 3.27035065  | -2.39115889 | -3.14874275 |
| C | 3.89852497  | -0.63573689 | -2.14364856 |
| H | 4.22693267  | -0.14507566 | -3.05540193 |
| C | 3.94071127  | 0.09841110  | -0.90355162 |
| C | 3.71574808  | -0.62638492 | 0.30404492  |
| C | 3.83214806  | 0.05753810  | 1.54648106  |
| C | 3.67289952  | -0.70723229 | 2.75479608  |
| H | 3.91331256  | -0.24147172 | 3.70641092  |
| C | 3.13825412  | -1.96149871 | 2.71892305  |
| H | 2.94792555  | -2.48472642 | 3.64906532  |
| C | 4.03806733  | 1.49731536  | -0.84971032 |
| H | 4.11318527  | 2.03628183  | -1.78893702 |
| C | 3.94421738  | 2.20388349  | 0.36254965  |

|   |             |             |             |
|---|-------------|-------------|-------------|
| C | 3.94478653  | 1.45880164  | 1.54931379  |
| H | 3.95163776  | 1.95985719  | 2.51038416  |
| C | 3.72063635  | 3.72518658  | 0.35050428  |
| C | 3.83800413  | 4.35027773  | 1.75494531  |
| H | 3.09726268  | 3.96192908  | 2.45936612  |
| H | 3.68770610  | 5.43220948  | 1.68795412  |
| H | 4.83191014  | 4.17951900  | 2.18106221  |
| C | 4.76409120  | 4.42068315  | -0.55538737 |
| H | 5.77931378  | 4.22381088  | -0.19702757 |
| H | 4.60614890  | 5.50417449  | -0.55035557 |
| H | 4.70308726  | 4.08758719  | -1.59550473 |
| C | 2.29695653  | 4.01789033  | -0.23626192 |
| H | 2.28801833  | 3.71191964  | -1.29133392 |
| H | 2.16609428  | 5.10823221  | -0.23561860 |
| C | 1.07907832  | 3.38234749  | 0.46356476  |
| H | 1.14489769  | 2.28498219  | 0.36709253  |
| H | 1.10565595  | 3.58749723  | 1.54049167  |
| C | -0.25656501 | 3.88824293  | -0.11494809 |
| H | -0.28738455 | 3.68342177  | -1.19249276 |
| H | -0.28722192 | 4.98120217  | -0.01483885 |
| C | -1.52156275 | 3.30358881  | 0.54100740  |
| H | -1.48855074 | 2.20451714  | 0.50971807  |
| H | -1.53625977 | 3.57459572  | 1.60356964  |
| C | -2.81161702 | 3.77059871  | -0.15838247 |
| H | -2.73772321 | 3.50162395  | -1.21879380 |
| H | -2.85117861 | 4.86740862  | -0.12145404 |
| C | -4.17548046 | 3.23812687  | 0.39887990  |
| C | -5.31079548 | 3.81298308  | -0.48162889 |
| H | -5.19810607 | 3.53771751  | -1.53434807 |
| H | -5.31527573 | 4.90661904  | -0.42636529 |
| H | -6.28597029 | 3.45139609  | -0.14048905 |
| C | -4.38626680 | 3.75743429  | 1.83422020  |
| H | -5.35799120 | 3.44649318  | 2.23161777  |
| H | -4.36630637 | 4.85163769  | 1.83320939  |
| H | -3.61158241 | 3.41656103  | 2.52724006  |
| N | -0.49106714 | -0.23951178 | -0.31458052 |
| H | -1.46970133 | -0.14715386 | -0.63641613 |
| C | 0.45990152  | -0.14496000 | -1.46508374 |
| C | -0.00171602 | 0.96106130  | -2.39129907 |
| H | 1.46641805  | 0.04249583  | -1.09114966 |
| H | 0.45468104  | -1.10039929 | -1.99365546 |
| O | -1.06928051 | 1.52204778  | -2.27903547 |
| O | 0.91269816  | 1.20360606  | -3.33392405 |
| H | 0.57438733  | 1.89315028  | -3.93297346 |
| H | -0.33785960 | 0.51803754  | 0.36001130  |
| H | -0.39649376 | -1.14265868 | 0.16723086  |



**endo-(TM7TPH<sup>+</sup>)(Gly)**

|   |             |             |             |
|---|-------------|-------------|-------------|
| C | -4.19131100 | 1.82992600  | 0.38949100  |
| C | -4.35001000 | 1.16462000  | -0.95201500 |
| H | -3.77209400 | 1.68887800  | -1.71948700 |
| C | -3.97860800 | -0.28711600 | -1.01855200 |
| C | -3.70055700 | -1.00068800 | 0.16415000  |
| C | -3.94901100 | -0.37688500 | 1.42726700  |
| C | -4.17454500 | 1.04285300  | 1.49886200  |
| H | -4.16595700 | 1.48219800  | 2.48961800  |
| C | -3.77658600 | -0.91896100 | -2.25300500 |
| H | -4.06611900 | -0.41510100 | -3.17000500 |
| C | -3.03866100 | -2.09077000 | -2.32021900 |
| H | -2.77542700 | -2.47833800 | -3.29821300 |
| C | -2.49537500 | -2.68268200 | -1.15453100 |
| C | -2.97104900 | -2.22302600 | 0.10696400  |
| C | -2.51077300 | -2.81472700 | 1.32027200  |
| C | -3.05078000 | -2.33055100 | 2.54199500  |
| H | -2.80884400 | -2.82992300 | 3.47359100  |
| C | -3.75334600 | -1.14114400 | 2.59730600  |
| H | -4.04116500 | -0.72887100 | 3.55955600  |
| C | -1.25428000 | -3.41519100 | -1.18121900 |
| C | -0.57826500 | -3.63498900 | 0.05249300  |
| C | -1.29284200 | -3.56653400 | 1.28884100  |
| C | -0.50836600 | -3.63593700 | -2.38142400 |
| H | -1.01748400 | -3.70393700 | -3.33613900 |
| C | 0.86277500  | -3.60181800 | -2.35515700 |
| H | 1.40690800  | -3.64778200 | -3.29257200 |
| C | 1.56524100  | -3.36035600 | -1.13036300 |
| C | 0.85505600  | -3.61131300 | 0.07932100  |
| C | 1.50924800  | -3.49408900 | 1.33927000  |
| C | 0.77496600  | -3.91576700 | 2.49681200  |
| H | 1.29377700  | -4.09408900 | 3.43246600  |
| C | -0.59188100 | -3.96720100 | 2.47129800  |
| H | -1.13542900 | -4.18022300 | 3.38475000  |
| C | 2.75504500  | -2.57447700 | -1.06434000 |
| C | 3.14277000  | -2.06472500 | 0.21141500  |
| C | 2.66225200  | -2.66369100 | 1.41726100  |
| C | 3.37283500  | -1.99545500 | -2.23029000 |
| H | 3.25850900  | -2.47980400 | -3.19429600 |
| C | 4.00116500  | -0.78395900 | -2.15722300 |
| H | 4.39299400  | -0.31545100 | -3.05647600 |
| C | 4.06785300  | -0.06631500 | -0.91175400 |
| C | 3.78742400  | -0.79231000 | 0.27958400  |
| C | 3.92668700  | -0.13381600 | 1.53147000  |
| C | 3.73190500  | -0.91007300 | 2.72515300  |
| H | 3.98858900  | -0.47112700 | 3.68522200  |
| C | 3.14034000  | -2.13893000 | 2.66872000  |
| H | 2.92280700  | -2.66547100 | 3.59089700  |
| C | 4.22243800  | 1.32728700  | -0.83770500 |
| H | 4.34438700  | 1.87471300  | -1.76738800 |
| C | 4.11211700  | 2.02419100  | 0.37913000  |

|   |             |             |             |
|---|-------------|-------------|-------------|
| C | 4.08084600  | 1.26257400  | 1.55580600  |
| H | 4.08705000  | 1.75095000  | 2.52325600  |
| C | 3.90663100  | 3.54929500  | 0.38496500  |
| C | 4.05797300  | 4.15850500  | 1.79268500  |
| H | 3.33248300  | 3.76257400  | 2.50795800  |
| H | 3.90487000  | 5.24100300  | 1.74109400  |
| H | 5.06205500  | 3.98273500  | 2.19264800  |
| C | 4.94251200  | 4.23780500  | -0.53517400 |
| H | 5.96267300  | 3.99848400  | -0.21881500 |
| H | 4.81989600  | 5.32483300  | -0.49376200 |
| H | 4.83494700  | 3.94040000  | -1.58272700 |
| C | 2.47552800  | 3.86645700  | -0.17515800 |
| H | 2.42503200  | 3.47715000  | -1.20269500 |
| H | 2.40206600  | 4.95842600  | -0.26874500 |
| C | 1.24536000  | 3.36129600  | 0.60672600  |
| H | 1.29778600  | 2.27260400  | 0.73930300  |
| H | 1.24434500  | 3.79150000  | 1.61552300  |
| C | -0.07526300 | 3.73804300  | -0.09645600 |
| H | -0.08964900 | 3.28817000  | -1.09944500 |
| H | -0.08752800 | 4.82446000  | -0.26385500 |
| C | -1.36530500 | 3.33543300  | 0.65024800  |
| H | -1.36683100 | 2.25526100  | 0.82827500  |
| H | -1.36896800 | 3.82383500  | 1.63251300  |
| C | -2.62154200 | 3.73876700  | -0.14805700 |
| H | -2.53105800 | 3.33293800  | -1.16229800 |
| H | -2.63188100 | 4.83138700  | -0.25914300 |
| C | -4.03547700 | 3.34797500  | 0.42503200  |
| C | -5.10704400 | 4.00247900  | -0.48443800 |
| H | -4.98325200 | 3.72857600  | -1.53635100 |
| H | -5.03187400 | 5.09214500  | -0.42078100 |
| H | -6.11643700 | 3.71659100  | -0.16955000 |
| C | -4.19859900 | 3.92277400  | 1.84446200  |
| H | -5.19632400 | 3.71361300  | 2.24424900  |
| H | -4.07197100 | 5.00926800  | 1.81371600  |
| H | -3.45863500 | 3.52963600  | 2.54613200  |
| H | -5.40454900 | 1.28633500  | -1.25315100 |
| N | 1.19558700  | 1.13298400  | -3.04186900 |
| H | -0.67699200 | 1.45101300  | -3.12911400 |
| C | 0.84014000  | 0.38395100  | -1.83273400 |
| C | -0.62087800 | 0.61108300  | -1.46957500 |
| H | 0.95415100  | -0.68948000 | -2.00172700 |
| H | 1.44819700  | 0.62943100  | -0.95849800 |
| O | -1.33302600 | 1.24677700  | -2.41435500 |
| O | -1.10715500 | 0.23696000  | -0.42382000 |
| H | 1.77034000  | 0.58543400  | -3.67283500 |
| H | 1.70443700  | 1.98336600  | -2.81988000 |

**exo-(TM7TPH<sup>+</sup>)(Gly)**

|   |             |             |             |
|---|-------------|-------------|-------------|
| C | -4.42884402 | 1.68410393  | 0.63282052  |
| C | -4.65866558 | 0.96948308  | -0.66981287 |
| H | -4.26169369 | 1.53776639  | -1.51721529 |
| C | -4.13366896 | -0.43241749 | -0.75083996 |
| C | -3.67686195 | -1.08584101 | 0.41456028  |
| C | -3.86173087 | -0.45443650 | 1.68809105  |
| C | -4.21186017 | 0.94189238  | 1.75217592  |
| H | -4.13547525 | 1.41354078  | 2.72526583  |
| C | -4.00245109 | -1.07744990 | -1.98790385 |
| H | -4.42152265 | -0.61421351 | -2.87546182 |
| C | -3.21140524 | -2.21358483 | -2.09839765 |
| H | -3.02073057 | -2.61218437 | -3.08861442 |
| C | -2.53595642 | -2.75492348 | -0.98006609 |
| C | -2.88735536 | -2.26817135 | 0.31264515  |
| C | -2.28184385 | -2.80800701 | 1.48862473  |
| C | -2.72040663 | -2.31617041 | 2.74313348  |
| H | -2.35277092 | -2.76959580 | 3.65707488  |
| C | -3.49393779 | -1.17084816 | 2.84378847  |
| H | -3.71248044 | -0.75396966 | 3.82222218  |
| C | -1.28437772 | -3.46081511 | -1.11706227 |
| C | -0.46579487 | -3.60048375 | 0.04106985  |
| C | -1.04037145 | -3.51578960 | 1.34673338  |
| C | -0.67131784 | -3.71259042 | -2.38112840 |
| H | -1.27923052 | -3.85349763 | -3.26750471 |
| C | 0.68916378  | -3.58698507 | -2.51236203 |
| H | 1.12784025  | -3.63599501 | -3.50314954 |
| C | 1.49921788  | -3.23747792 | -1.38682635 |
| C | 0.95722764  | -3.50384036 | -0.09644116 |
| C | 1.74408256  | -3.30778071 | 1.07431203  |
| C | 1.16715341  | -3.72058335 | 2.31801092  |
| H | 1.79260359  | -3.82759030 | 3.19769749  |
| C | -0.19264383 | -3.83707064 | 2.45159891  |
| H | -0.61622087 | -4.02791342 | 3.43113642  |
| C | 2.59549181  | -2.32770381 | -1.47617350 |
| C | 3.10554894  | -1.77568354 | -0.26101558 |
| C | 2.84565049  | -2.40439652 | 0.99688742  |
| C | 2.95701112  | -1.68762926 | -2.71199241 |
| H | 2.72270042  | -2.16823767 | -3.65514314 |
| C | 3.45800343  | -0.41683102 | -2.71574137 |
| H | 3.62807879  | 0.09941134  | -3.65659607 |
| C | 3.66698552  | 0.29408430  | -1.48478964 |
| C | 3.64364128  | -0.45375988 | -0.27400757 |
| C | 3.92698815  | 0.21314453  | 0.94829958  |
| C | 3.96748978  | -0.57485139 | 2.14816873  |
| H | 4.33280668  | -0.11933112 | 3.06452329  |
| C | 3.45886516  | -1.84312783 | 2.16935494  |
| H | 3.41534403  | -2.38142709 | 3.10945078  |
| C | 3.73054168  | 1.69353410  | -1.41873095 |
| H | 3.64551681  | 2.24959795  | -2.34728513 |
| C | 3.77662292  | 2.37936079  | -0.19280593 |

|   |             |            |             |
|---|-------------|------------|-------------|
| C | 3.98823826  | 1.61830622 | 0.96455874  |
| H | 4.11399380  | 2.10529892 | 1.92479201  |
| C | 3.47030564  | 3.88518821 | -0.14952848 |
| C | 3.66540530  | 4.48498669 | 1.25651490  |
| H | 3.01552667  | 4.02545581 | 2.00639001  |
| H | 3.43218751  | 5.55411507 | 1.23284770  |
| H | 4.70223586  | 4.38035917 | 1.59352662  |
| C | 4.40226361  | 4.65069995 | -1.11865035 |
| H | 5.45169430  | 4.50847018 | -0.84095783 |
| H | 4.18358201  | 5.72324944 | -1.08457820 |
| H | 4.28060268  | 4.32547402 | -2.15607347 |
| C | 1.98927089  | 4.10909850 | -0.61522013 |
| H | 1.91024237  | 3.81112685 | -1.66909344 |
| H | 1.80864736  | 5.19273198 | -0.59391429 |
| C | 0.86619032  | 3.40512939 | 0.17298954  |
| H | 1.00191051  | 2.31662212 | 0.12029385  |
| H | 0.92591291  | 3.67407347 | 1.23543750  |
| C | -0.53178186 | 3.78195404 | -0.35829736 |
| H | -0.60587997 | 3.49722074 | -1.41731098 |
| H | -0.63306321 | 4.87641872 | -0.33241126 |
| C | -1.71586961 | 3.16125576 | 0.41162775  |
| H | -1.66043539 | 2.06572742 | 0.34933184  |
| H | -1.62171128 | 3.41374610 | 1.47574118  |
| C | -3.06951857 | 3.65311900 | -0.13804862 |
| H | -3.14622553 | 3.36876092 | -1.19305522 |
| H | -3.07663688 | 4.75136152 | -0.12224231 |
| C | -4.38467932 | 3.20586101 | 0.60603182  |
| C | -5.58904849 | 3.76066208 | -0.19578354 |
| H | -5.58044007 | 3.42302266 | -1.23561893 |
| H | -5.55263567 | 4.85453103 | -0.20584921 |
| H | -6.53697919 | 3.45911353 | 0.26320646  |
| C | -4.42135908 | 3.82189149 | 2.01722441  |
| H | -5.33384282 | 3.53698509 | 2.55168407  |
| H | -4.40808237 | 4.91316396 | 1.93898180  |
| H | -3.56246443 | 3.52974368 | 2.62720875  |
| H | -5.74734814 | 0.95741417 | -0.85133930 |
| N | -6.33565127 | 2.52115925 | -6.17754493 |
| H | -6.26798508 | 1.25333643 | -4.80478211 |
| C | -5.18602437 | 3.11371028 | -5.48166900 |
| C | -4.84138787 | 2.29686345 | -4.22963237 |
| H | -4.28821098 | 3.14104552 | -6.10698410 |
| H | -5.37269859 | 4.14212242 | -5.15683775 |
| O | -5.62995421 | 1.22989461 | -4.04203252 |
| O | -3.93848314 | 2.58639804 | -3.47119337 |
| H | -6.12010270 | 2.23408821 | -7.12588951 |
| H | -7.14023202 | 3.13782052 | -6.20841401 |

**exo-(TM7TP)(GlyH<sup>+</sup>)**

|   |             |             |             |
|---|-------------|-------------|-------------|
| C | 2.43715506  | 4.33111151  | 0.01811103  |
| C | 1.68269541  | 4.24362073  | -1.16495443 |
| H | 2.17007400  | 4.36413946  | -2.12743616 |
| C | 0.32919093  | 3.88241455  | -1.15714066 |
| C | -0.30188085 | 3.59295994  | 0.08655913  |
| C | 0.38666167  | 3.89999213  | 1.29208906  |
| C | 1.74371709  | 4.26375997  | 1.23337575  |
| H | 2.26842813  | 4.40297979  | 2.17157888  |
| C | -0.41413560 | 3.63474681  | -2.36366734 |
| H | -0.01211637 | 3.98809206  | -3.30922353 |
| C | -1.55167555 | 2.88288443  | -2.34059127 |
| H | -2.04192241 | 2.63344011  | -3.27480774 |
| C | -2.01645487 | 2.29270162  | -1.11066445 |
| C | -1.48434401 | 2.79343095  | 0.11928029  |
| C | -1.95239757 | 2.30189765  | 1.37772379  |
| C | -1.42769838 | 2.90222411  | 2.57667346  |
| H | -1.86635537 | 2.65888175  | 3.53809730  |
| C | -0.29377492 | 3.66117872  | 2.53523097  |
| H | 0.15363917  | 4.02374803  | 3.45660656  |
| C | -2.69509268 | 1.04497894  | -1.08762974 |
| C | -2.76105014 | 0.34570538  | 0.15480668  |
| C | -2.62379297 | 1.04791233  | 1.39038147  |
| C | -3.00160336 | 0.28950109  | -2.28022453 |
| H | -3.23165974 | 0.80702018  | -3.20531224 |
| C | -2.86183372 | -1.06699847 | -2.28575960 |
| H | -2.98311870 | -1.61435611 | -3.21415204 |
| C | -2.39952438 | -1.75085237 | -1.09955430 |
| C | -2.61001658 | -1.09125723 | 0.14878968  |
| C | -2.30869204 | -1.75450622 | 1.38014055  |
| C | -2.68675377 | -1.07313147 | 2.59502417  |
| H | -2.71889853 | -1.61348411 | 3.53537972  |
| C | -2.84767377 | 0.28903841  | 2.59898820  |
| H | -2.99952138 | 0.80124024  | 3.54341817  |
| C | -1.45905505 | -2.81508004 | -1.13583695 |
| C | -0.81815616 | -3.19070743 | 0.08674319  |
| C | -1.37481932 | -2.82614194 | 1.35249406  |
| C | -0.88207375 | -3.27684793 | -2.37298467 |
| H | -1.42378697 | -3.14011946 | -3.30199587 |
| C | 0.39595140  | -3.75178356 | -2.40863457 |
| H | 0.86011881  | -3.99921807 | -3.35934845 |
| C | 1.18452255  | -3.83465733 | -1.20840856 |
| C | 0.51297153  | -3.70447562 | 0.04090548  |
| C | 1.26054604  | -3.86033382 | 1.24031513  |
| C | 0.55215154  | -3.79118223 | 2.48897669  |
| H | 1.07508626  | -4.05384769 | 3.40444804  |
| C | -0.72207864 | -3.30498528 | 2.54318321  |
| H | -1.19852418 | -3.17488567 | 3.50860020  |
| C | 2.58467086  | -3.88347402 | -1.22584863 |
| H | 3.08020564  | -3.88364287 | -2.19169717 |
| C | 3.34718422  | -3.81144213 | -0.04698573 |

|   |             |             |             |
|---|-------------|-------------|-------------|
| C | 2.66385767  | -3.91159681 | 1.17197397  |
| H | 3.21243511  | -3.93940553 | 2.10640747  |
| C | 4.85009743  | -3.49961105 | -0.13036895 |
| C | 5.54269776  | -3.56619859 | 1.24461463  |
| H | 5.12817063  | -2.85268477 | 1.96202454  |
| H | 6.60580257  | -3.33286949 | 1.12914514  |
| H | 5.46923134  | -4.56902395 | 1.67899367  |
| C | 5.55818334  | -4.51282607 | -1.06081447 |
| H | 5.44170449  | -5.53389384 | -0.68307032 |
| H | 6.62902848  | -4.29010916 | -1.11521530 |
| H | 5.16677510  | -4.48366663 | -2.08192112 |
| C | 5.02808228  | -2.06567314 | -0.74027493 |
| H | 4.65274718  | -2.08127155 | -1.77206778 |
| H | 6.10862229  | -1.88095816 | -0.81497710 |
| C | 4.37285624  | -0.88146203 | -0.00246446 |
| H | 3.28778792  | -1.03802751 | 0.06190319  |
| H | 4.74060665  | -0.83223180 | 1.03048123  |
| C | 4.66047448  | 0.46464228  | -0.69727678 |
| H | 4.26763577  | 0.43054110  | -1.72376818 |
| H | 5.74884230  | 0.58647023  | -0.79446724 |
| C | 4.08569454  | 1.70180294  | 0.02142632  |
| H | 2.99266119  | 1.61609584  | 0.08440881  |
| H | 4.45553056  | 1.71462804  | 1.05472452  |
| C | 4.46593786  | 3.01443041  | -0.69162482 |
| H | 4.10104237  | 2.96479263  | -1.72607899 |
| H | 5.56086267  | 3.07462612  | -0.76061945 |
| C | 3.97200726  | 4.36227861  | -0.05989055 |
| C | 4.43986658  | 5.52339718  | -0.96909368 |
| H | 4.06584085  | 5.42651610  | -1.99258560 |
| H | 5.53353828  | 5.54411278  | -1.02156495 |
| H | 4.09975188  | 6.48652401  | -0.57466559 |
| C | 4.62806565  | 4.55697294  | 1.32080319  |
| H | 4.33352414  | 5.51134893  | 1.77042889  |
| H | 5.71685047  | 4.56616866  | 1.20928363  |
| H | 4.37869606  | 3.75743971  | 2.02385541  |
| N | -5.50452656 | -0.82653622 | 1.01600375  |
| H | -4.88010882 | -1.33832174 | 0.37413496  |
| C | -6.12231412 | 0.34982439  | 0.33171993  |
| C | -7.24683488 | -0.16109260 | -0.55462719 |
| H | -6.51568565 | 1.03777110  | 1.08444000  |
| H | -5.34883997 | 0.86349001  | -0.24276904 |
| O | -7.63087256 | -1.31043855 | -0.52212656 |
| O | -7.73107011 | 0.81239212  | -1.32268257 |
| H | -8.46657399 | 0.46796513  | -1.86153295 |
| H | -6.22904658 | -1.48142527 | 1.33254276  |
| H | -4.89092889 | -0.54700770 | 1.80476791  |

**endo-(TM8TP)(GlyH<sup>+</sup>)**

|   |             |             |             |
|---|-------------|-------------|-------------|
| C | 4.29666698  | 2.21985121  | 0.02556910  |
| C | 4.28619556  | 1.51188918  | 1.24049474  |
| H | 4.26710801  | 2.05343802  | 2.18105821  |
| C | 4.19062389  | 0.11326247  | 1.29284288  |
| C | 4.09352701  | -0.62055469 | 0.07480750  |
| C | 4.33713671  | 0.06089887  | -1.15383985 |
| C | 4.42315085  | 1.46945897  | -1.15539274 |
| H | 4.53398883  | 1.96780257  | -2.11224705 |
| C | 4.00889276  | -0.60635077 | 2.52743534  |
| H | 4.24867620  | -0.11206106 | 3.46447284  |
| C | 3.44737544  | -1.84856397 | 2.52783938  |
| H | 3.23840536  | -2.33421413 | 3.47394269  |
| C | 2.99373486  | -2.45646554 | 1.29976181  |
| C | 3.48602064  | -1.91961903 | 0.07107629  |
| C | 3.09328661  | -2.48789821 | -1.18137312 |
| C | 3.69275788  | -1.94524589 | -2.37951625 |
| H | 3.58850549  | -2.47749921 | -3.31848524 |
| C | 4.28775762  | -0.71632093 | -2.36982469 |
| H | 4.65738060  | -0.27707091 | -3.29222739 |
| C | 1.83522393  | -3.28416695 | 1.26155459  |
| C | 1.18219924  | -3.47119778 | 0.00487306  |
| C | 1.89959290  | -3.26733569 | -1.21534587 |
| C | 1.10046990  | -3.64722723 | 2.44549261  |
| H | 1.61894208  | -3.75796483 | 3.39099902  |
| C | -0.25977791 | -3.73454416 | 2.41110117  |
| H | -0.80057210 | -3.91790209 | 3.33256206  |
| C | -0.98367191 | -3.46909197 | 1.19584814  |
| C | -0.25544107 | -3.55115562 | -0.02851604 |
| C | -0.92681428 | -3.41063480 | -1.28071914 |
| C | -0.15155516 | -3.63720733 | -2.47291392 |
| H | -0.65371793 | -3.78216923 | -3.42278229 |
| C | 1.21155893  | -3.57826967 | -2.44468336 |
| H | 1.76958810  | -3.67299212 | -3.36939263 |
| C | -2.27656489 | -2.87526232 | 1.18284619  |
| C | -2.79094974 | -2.39392690 | -0.06035541 |
| C | -2.21255607 | -2.80396935 | -1.30139179 |
| C | -2.95778581 | -2.48078468 | 2.39000119  |
| H | -2.70091754 | -2.95464762 | 3.33031196  |
| C | -3.84147160 | -1.44084824 | 2.39122692  |
| H | -4.28008656 | -1.09589141 | 3.32356369  |
| C | -4.12595555 | -0.71828553 | 1.17670778  |
| C | -3.72604927 | -1.31208423 | -0.05469646 |
| C | -4.07429463 | -0.66071093 | -1.27005881 |
| C | -3.71205179 | -1.30089403 | -2.50542909 |
| H | -4.09884256 | -0.89917409 | -3.43782839 |
| C | -2.82345533 | -2.33468668 | -2.51903943 |
| H | -2.50919133 | -2.74808559 | -3.47060641 |
| C | -4.62943340 | 0.60034844  | 1.17228278  |
| H | -4.85422022 | 1.05902691  | 2.12931110  |
| C | -4.77079564 | 1.33326195  | -0.01694462 |

|   |             |             |             |
|---|-------------|-------------|-------------|
| C | -4.59322311 | 0.63957021  | -1.22488465 |
| H | -4.75988744 | 1.14808721  | -2.16907429 |
| C | -4.99689383 | 2.85704355  | -0.04244955 |
| C | -6.17853605 | 3.20133308  | -0.97996631 |
| H | -5.97898622 | 2.92382332  | -2.01908543 |
| H | -6.37158499 | 4.27884626  | -0.96183567 |
| H | -7.09065228 | 2.68672998  | -0.66139851 |
| C | -5.31807317 | 3.42852316  | 1.35117755  |
| H | -6.24757317 | 3.00699543  | 1.74821614  |
| H | -5.44883332 | 4.51300137  | 1.28121192  |
| H | -4.52208952 | 3.24355123  | 2.07817702  |
| C | -3.70273878 | 3.54046628  | -0.61018487 |
| H | -3.46758293 | 3.07628231  | -1.57592565 |
| H | -3.94769707 | 4.58846100  | -0.82683756 |
| C | -2.44882238 | 3.49658596  | 0.28481445  |
| H | -2.38519766 | 2.51722419  | 0.77155969  |
| H | -2.54357775 | 4.23106516  | 1.09428578  |
| C | -1.13566877 | 3.75042642  | -0.48072894 |
| H | -1.01583129 | 2.95997446  | -1.23346614 |
| H | -1.20813990 | 4.69407902  | -1.03786347 |
| C | 0.10908516  | 3.80149417  | 0.42814454  |
| H | 0.06947051  | 2.97817183  | 1.15762050  |
| H | 0.07223881  | 4.71835496  | 1.03126678  |
| C | 1.45603430  | 3.74986222  | -0.32230258 |
| H | 1.58399694  | 2.75639595  | -0.78111919 |
| H | 1.42626591  | 4.45372507  | -1.16244696 |
| C | 2.66191559  | 4.07275237  | 0.58242440  |
| H | 2.53607808  | 3.56095653  | 1.54553351  |
| H | 2.63310896  | 5.14591705  | 0.81054171  |
| C | 4.09464531  | 3.74736291  | 0.03257957  |
| C | 5.13182448  | 4.40293650  | 0.97702070  |
| H | 4.99571104  | 4.09787861  | 2.01863478  |
| H | 5.03727248  | 5.49289755  | 0.94102458  |
| H | 6.15108037  | 4.13966749  | 0.67752694  |
| C | 4.26934607  | 4.37073595  | -1.36475420 |
| H | 5.28717136  | 4.22331105  | -1.74041347 |
| H | 4.09014433  | 5.44895516  | -1.30978297 |
| H | 3.57153984  | 3.96280083  | -2.10189223 |
| N | 1.21856940  | -0.00500573 | -1.13264926 |
| H | 0.46142964  | 0.40980370  | -1.70064146 |
| C | 0.81310778  | 0.11767604  | 0.30293445  |
| C | -0.68912263 | 0.32715694  | 0.30734744  |
| H | 1.08879009  | -0.78458603 | 0.84536183  |
| H | 1.32828506  | 0.96765353  | 0.75242218  |
| O | -1.30308423 | 0.51247081  | -0.72522055 |
| O | -1.18859961 | 0.28707617  | 1.52927907  |
| H | -2.16806208 | 0.35530766  | 1.49092151  |
| H | 1.31892081  | -0.99342009 | -1.40354887 |
| H | 2.12221780  | 0.45235503  | -1.31812531 |



**endo-(TM8TPH<sup>+</sup>)(Gly)**

|   |             |             |             |
|---|-------------|-------------|-------------|
| C | -4.67689400 | 1.64347600  | 0.14398000  |
| C | -4.79334000 | 0.84771100  | -1.12835300 |
| H | -4.30544800 | 1.37094300  | -1.95739400 |
| C | -4.25150500 | -0.54949300 | -1.09264300 |
| C | -3.82881600 | -1.11410300 | 0.12930000  |
| C | -4.08628500 | -0.41155400 | 1.34791300  |
| C | -4.49525700 | 0.97085400  | 1.31202600  |
| H | -4.50523700 | 1.49645200  | 2.26017000  |
| C | -4.05200000 | -1.26799600 | -2.27620700 |
| H | -4.44360600 | -0.88397700 | -3.21340300 |
| C | -3.20484500 | -2.36575600 | -2.28860500 |
| H | -2.95689800 | -2.81268700 | -3.24442400 |
| C | -2.55092200 | -2.80099200 | -1.11352800 |
| C | -2.99016700 | -2.26623200 | 0.13216600  |
| C | -2.42890900 | -2.72277000 | 1.36328800  |
| C | -2.93612600 | -2.16819600 | 2.56596900  |
| H | -2.60178300 | -2.55656300 | 3.52165000  |
| C | -3.74093800 | -1.04050700 | 2.56180300  |
| H | -4.01538600 | -0.57242300 | 3.50234700  |
| C | -1.27080500 | -3.46320400 | -1.15211300 |
| C | -0.52113000 | -3.56017000 | 0.05846000  |
| C | -1.17189000 | -3.42056800 | 1.32303700  |
| C | -0.58776300 | -3.75177000 | -2.36877400 |
| H | -1.14279500 | -3.88994900 | -3.28901300 |
| C | 0.78157400  | -3.67840400 | -2.42185300 |
| H | 1.27175900  | -3.76679900 | -3.38490100 |
| C | 1.54490300  | -3.35084600 | -1.26079700 |
| C | 0.91056000  | -3.52538400 | 0.00278300  |
| C | 1.64878000  | -3.36156700 | 1.21094500  |
| C | 0.97189900  | -3.66863200 | 2.43336500  |
| H | 1.53567600  | -3.77375800 | 3.35384900  |
| C | -0.39839000 | -3.70390700 | 2.49013900  |
| H | -0.88537400 | -3.83091200 | 3.45030300  |
| C | 2.74062500  | -2.57066500 | -1.31362700 |
| C | 3.26895900  | -2.06329700 | -0.08681800 |
| C | 2.86273700  | -2.61287700 | 1.16823900  |
| C | 3.22902100  | -2.00834300 | -2.54142800 |
| H | 2.95760700  | -2.46195000 | -3.48730700 |
| C | 3.89968200  | -0.81788400 | -2.54435600 |
| H | 4.16139300  | -0.34356300 | -3.48588700 |
| C | 4.16415700  | -0.12067900 | -1.31775200 |
| C | 3.99114200  | -0.83119400 | -0.09946200 |
| C | 4.31319300  | -0.17850500 | 1.12301100  |
| C | 4.19034500  | -0.93550500 | 2.33833500  |
| H | 4.58713700  | -0.51995100 | 3.26075100  |
| C | 3.49966700  | -2.11476000 | 2.35867200  |
| H | 3.34924000  | -2.62476000 | 3.30362700  |
| C | 4.41614500  | 1.26379000  | -1.27594400 |
| H | 4.45052000  | 1.79654200  | -2.21924800 |
| C | 4.51085200  | 1.96289500  | -0.06526100 |

|   |             |             |             |
|---|-------------|-------------|-------------|
| C | 4.56669900  | 1.20060500  | 1.11554400  |
| H | 4.72143800  | 1.69206500  | 2.07101600  |
| C | 4.42920600  | 3.49800400  | 0.01545700  |
| C | 5.52119300  | 4.04614400  | 0.96449900  |
| H | 5.38196300  | 3.71465900  | 1.99780500  |
| H | 5.49763000  | 5.14050900  | 0.97087200  |
| H | 6.51668300  | 3.72951000  | 0.63735200  |
| C | 4.62135600  | 4.16997300  | -1.35760500 |
| H | 5.61132900  | 3.94765600  | -1.76963000 |
| H | 4.54201200  | 5.25610900  | -1.24794500 |
| H | 3.87058300  | 3.86284500  | -2.09027800 |
| C | 3.02806900  | 3.88572400  | 0.60711500  |
| H | 2.91336400  | 3.36996800  | 1.57138100  |
| H | 3.05607600  | 4.95760000  | 0.84437600  |
| C | 1.78866600  | 3.61158300  | -0.26603400 |
| H | 1.82995300  | 2.59444700  | -0.67817900 |
| H | 1.79388400  | 4.28514000  | -1.13144500 |
| C | 0.45969100  | 3.79889900  | 0.49481100  |
| H | 0.37663300  | 3.02778700  | 1.27603600  |
| H | 0.47875400  | 4.75386700  | 1.03723200  |
| C | -0.78888300 | 3.75402200  | -0.40971100 |
| H | -0.69000500 | 2.94404800  | -1.14148600 |
| H | -0.83234000 | 4.68365500  | -0.99330500 |
| C | -2.11309500 | 3.56605600  | 0.35634800  |
| H | -2.10423900 | 2.58675900  | 0.84994500  |
| H | -2.18081600 | 4.31699000  | 1.15358500  |
| C | -3.34785400 | 3.65822000  | -0.55742600 |
| H | -3.14289800 | 3.10332700  | -1.48046200 |
| H | -3.49173200 | 4.70432300  | -0.85684900 |
| C | -4.72222900 | 3.16584600  | 0.03641800  |
| C | -5.84562300 | 3.59651300  | -0.93947000 |
| H | -5.66172100 | 3.25944500  | -1.96369100 |
| H | -5.91316400 | 4.68803800  | -0.96535900 |
| H | -6.81783800 | 3.20821100  | -0.61705000 |
| C | -4.98218000 | 3.84561300  | 1.39362300  |
| H | -5.95263800 | 3.54715500  | 1.80352300  |
| H | -4.99269600 | 4.93178700  | 1.26136300  |
| H | -4.21278900 | 3.61863600  | 2.13571500  |
| H | -5.86171200 | 0.81899100  | -1.40147100 |
| N | 1.13932100  | 0.23226000  | 1.15243400  |
| H | 1.34170100  | -0.01698400 | -0.71946200 |
| C | -0.28509000 | 0.19768600  | 0.83592000  |
| C | -0.49118100 | 0.29216900  | -0.68068200 |
| H | -0.71058800 | -0.75870300 | 1.14857000  |
| H | -0.88400900 | 0.98151800  | 1.30745700  |
| O | 0.62202900  | 0.09165500  | -1.39218000 |
| O | -1.56916400 | 0.51594500  | -1.19220100 |
| H | 1.40732800  | -0.40440700 | 1.89319300  |
| H | 1.47286800  | 1.16164000  | 1.38575600  |

**exo-(TM8TPH<sup>+</sup>)(Gly)**

|   |             |             |             |
|---|-------------|-------------|-------------|
| C | -4.85893518 | 1.70167294  | 0.60803993  |
| C | -5.09867674 | 0.91970059  | -0.65526096 |
| H | -4.78102784 | 1.47270578  | -1.54399188 |
| C | -4.48570841 | -0.44815172 | -0.69903878 |
| C | -3.98103879 | -1.03412679 | 0.48218491  |
| C | -4.18403286 | -0.36729014 | 1.73521178  |
| C | -4.59502514 | 1.01428508  | 1.75237215  |
| H | -4.51654513 | 1.52910995  | 2.70332567  |
| C | -4.32645343 | -1.12228018 | -1.91609208 |
| H | -4.77033325 | -0.70942823 | -2.81648591 |
| C | -3.48096839 | -2.22180364 | -1.99598537 |
| H | -3.27941863 | -2.64262083 | -2.97467684 |
| C | -2.77830116 | -2.69839390 | -0.86660049 |
| C | -3.13484498 | -2.17880681 | 0.41180576  |
| C | -2.50561025 | -2.65946039 | 1.60087037  |
| C | -2.94793975 | -2.13734950 | 2.84094851  |
| H | -2.55426120 | -2.54212649 | 3.76665985  |
| C | -3.76770424 | -1.02182344 | 2.91028873  |
| H | -3.99172913 | -0.57859709 | 3.87583474  |
| C | -1.51791880 | -3.39373543 | -0.98835293 |
| C | -0.69494372 | -3.50638043 | 0.17001550  |
| C | -1.26012073 | -3.36427651 | 1.47551556  |
| C | -0.92101178 | -3.69979428 | -2.24497224 |
| H | -1.53783033 | -3.83623714 | -3.12562788 |
| C | 0.44471117  | -3.65123184 | -2.38667886 |
| H | 0.87085257  | -3.75460748 | -3.37857654 |
| C | 1.28448646  | -3.32712118 | -1.27954116 |
| C | 0.72944931  | -3.48863118 | 0.02241841  |
| C | 1.54069475  | -3.31990454 | 1.18184427  |
| C | 0.94513629  | -3.63350857 | 2.44299492  |
| H | 1.56720880  | -3.74011059 | 3.32486888  |
| C | -0.41866610 | -3.66830217 | 2.58723204  |
| H | -0.84304423 | -3.79641383 | 3.57639761  |
| C | 2.48310074  | -2.55866418 | -1.41234274 |
| C | 3.07512528  | -2.02946662 | -0.22494332 |
| C | 2.73989465  | -2.55701542 | 1.06154698  |
| C | 2.92256814  | -2.03538964 | -2.67460590 |
| H | 2.60283591  | -2.51049727 | -3.59500301 |
| C | 3.62494652  | -0.86346281 | -2.73941552 |
| H | 3.86308313  | -0.42488794 | -3.70463106 |
| C | 3.96327569  | -0.14234812 | -1.54661481 |
| C | 3.81701712  | -0.81326904 | -0.30265276 |
| C | 4.21325651  | -0.14225819 | 0.88790483  |
| C | 4.13436226  | -0.86644636 | 2.12562285  |
| H | 4.57192038  | -0.42977918 | 3.01918353  |
| C | 3.43621748  | -2.03774572 | 2.20648721  |
| H | 3.31910976  | -2.51817560 | 3.17109162  |
| C | 4.26268827  | 1.23338389  | -1.55354728 |
| H | 4.27511719  | 1.74183116  | -2.51100117 |
| C | 4.41690166  | 1.95943098  | -0.36577231 |

|   |             |            |             |
|---|-------------|------------|-------------|
| C | 4.50420116  | 1.22761582 | 0.83165447  |
| H | 4.70428051  | 1.74119627 | 1.76662312  |
| C | 4.32527470  | 3.49355080 | -0.31203933 |
| C | 5.46951342  | 4.07948018 | 0.54716078  |
| H | 5.42256690  | 3.74639457 | 1.58811609  |
| H | 5.41174845  | 5.17279314 | 0.55448366  |
| H | 6.44594762  | 3.79313281 | 0.14300692  |
| C | 4.40580055  | 4.13967877 | -1.70793839 |
| H | 5.36381431  | 3.92014135 | -2.19152942 |
| H | 4.32213471  | 5.22694298 | -1.61267667 |
| H | 3.60356665  | 3.80973735 | -2.37349716 |
| C | 2.95784136  | 3.85909991 | 0.36605552  |
| H | 2.93691280  | 3.39328708 | 1.36006613  |
| H | 2.95342226  | 4.94376751 | 0.53984733  |
| C | 1.67135201  | 3.47496021 | -0.39191241 |
| H | 1.75835377  | 2.45512573 | -0.78996104 |
| H | 1.54820740  | 4.13423466 | -1.26081519 |
| C | 0.40787377  | 3.56048319 | 0.48838338  |
| H | 0.43926125  | 2.75283637 | 1.23418329  |
| H | 0.42226706  | 4.50001863 | 1.05913123  |
| C | -0.91162003 | 3.48524157 | -0.30252781 |
| H | -0.88124543 | 2.63181411 | -0.99511662 |
| H | -0.99535183 | 4.38176433 | -0.93297998 |
| C | -2.16774793 | 3.36425545 | 0.58517264  |
| H | -2.18151148 | 2.36779108 | 1.04688222  |
| H | -2.09308137 | 4.08328911 | 1.41097106  |
| C | -3.47211111 | 3.60935075 | -0.19817823 |
| H | -3.42038550 | 3.09751182 | -1.16546641 |
| H | -3.54235342 | 4.67898938 | -0.43613883 |
| C | -4.82845384 | 3.22071224 | 0.50708728  |
| C | -5.99126176 | 3.72816204 | -0.38111027 |
| H | -5.90570789 | 3.37562570 | -1.41200086 |
| H | -5.98120903 | 4.82220322 | -0.40813704 |
| H | -6.95923170 | 3.41124655 | 0.02283781  |
| C | -4.92808882 | 3.91095081 | 1.87936083  |
| H | -5.87461193 | 3.66889757 | 2.37433087  |
| H | -4.88695252 | 4.99630157 | 1.74535801  |
| H | -4.11082447 | 3.63765919 | 2.55147605  |
| H | -6.19276997 | 0.82872121 | -0.77519811 |
| N | -6.43826333 | 2.13578455 | -6.52748188 |
| H | -6.33191572 | 0.84414621 | -5.17863631 |
| C | -5.52996311 | 2.89697084 | -5.65988558 |
| C | -5.22895352 | 2.10813593 | -4.37881805 |
| H | -4.57043503 | 3.10480939 | -6.14352423 |
| H | -5.94368496 | 3.86379710 | -5.35641525 |
| O | -5.82106443 | 0.90789077 | -4.32769340 |
| O | -4.52035099 | 2.53017784 | -3.48769656 |
| H | -6.04373773 | 1.94110064 | -7.44101905 |
| H | -7.33398898 | 2.59274616 | -6.65985127 |

**exo-(TM8TP)(GlyH<sup>+</sup>)**

|   |             |             |             |
|---|-------------|-------------|-------------|
| C | 1.37468505  | 5.08236271  | 0.00475711  |
| C | 0.64796889  | 4.82200899  | -1.17000706 |
| H | 1.07117652  | 5.07759111  | -2.13613765 |
| C | -0.56374995 | 4.11961744  | -1.15340490 |
| C | -1.07719008 | 3.65641886  | 0.09134463  |
| C | -0.47430260 | 4.11672081  | 1.29418771  |
| C | 0.74024701  | 4.82298761  | 1.22668661  |
| H | 1.22631507  | 5.08098739  | 2.16074954  |
| C | -1.23227470 | 3.70347517  | -2.35628223 |
| H | -0.94624972 | 4.15964869  | -3.30000725 |
| C | -2.13799401 | 2.68382316  | -2.33423487 |
| H | -2.55961297 | 2.33044737  | -3.26826177 |
| C | -2.42696009 | 1.98256087  | -1.11000422 |
| C | -2.01530844 | 2.58082400  | 0.12236749  |
| C | -2.33725582 | 1.97727672  | 1.37804085  |
| C | -1.95474755 | 2.66993003  | 2.58033807  |
| H | -2.30079158 | 2.31047989  | 3.54302110  |
| C | -1.04917795 | 3.69103277  | 2.54001571  |
| H | -0.69202611 | 4.13930426  | 3.46309659  |
| C | -2.80894396 | 0.61300796  | -1.09850822 |
| C | -2.72687690 | -0.09721751 | 0.13711154  |
| C | -2.72173199 | 0.60769542  | 1.37994707  |
| C | -2.97183139 | -0.17251955 | -2.29659476 |
| H | -3.27628524 | 0.30708221  | -3.22033336 |
| C | -2.61580911 | -1.48999779 | -2.31375313 |
| H | -2.64375108 | -2.03660049 | -3.24983323 |
| C | -2.06805243 | -2.11307560 | -1.13410787 |
| C | -2.35206553 | -1.49081670 | 0.11856103  |
| C | -1.97088636 | -2.12205867 | 1.34587061  |
| C | -2.43222413 | -1.50791067 | 2.56568833  |
| H | -2.37634956 | -2.05142571 | 3.50287554  |
| C | -2.80138208 | -0.18648692 | 2.58157675  |
| H | -3.02526199 | 0.28685382  | 3.53177491  |
| C | -1.02843901 | -3.08398809 | -1.17783888 |
| C | -0.35865446 | -3.41329982 | 0.04203575  |
| C | -0.93918667 | -3.09793326 | 1.31067943  |
| C | -0.42054613 | -3.49586078 | -2.41537299 |
| H | -0.96629006 | -3.38445889 | -3.34528203 |
| C | 0.88406706  | -3.89704661 | -2.45331360 |
| H | 1.36132885  | -4.10879838 | -3.40618101 |
| C | 1.67546618  | -3.94440919 | -1.25552274 |
| C | 1.00053935  | -3.84611898 | -0.00781863 |
| C | 1.75842636  | -3.95939759 | 1.19236481  |
| C | 1.04983906  | -3.93506612 | 2.44323597  |
| H | 1.59006557  | -4.16683694 | 3.35697442  |
| C | -0.25202867 | -3.53226162 | 2.49950480  |
| H | -0.73487059 | -3.43864024 | 3.46583134  |
| C | 3.08167118  | -3.91936854 | -1.27883515 |
| H | 3.56976371  | -3.90226106 | -2.24667554 |
| C | 3.83603311  | -3.79630740 | -0.10472268 |

|   |             |             |             |
|---|-------------|-------------|-------------|
| C | 3.15680498  | -3.93276788 | 1.11855738  |
| H | 3.71251553  | -3.91965572 | 2.05068169  |
| C | 5.31183905  | -3.36401090 | -0.10746790 |
| C | 6.14626489  | -4.26759860 | 0.82978918  |
| H | 5.82349550  | -4.19800368 | 1.87275923  |
| H | 7.19979599  | -3.97140171 | 0.79658794  |
| H | 6.07789890  | -5.31636119 | 0.52262753  |
| C | 5.94444431  | -3.42798387 | -1.51033282 |
| H | 5.93846635  | -4.45103537 | -1.90181725 |
| H | 6.98664805  | -3.09765558 | -1.45648917 |
| H | 5.43676071  | -2.78266808 | -2.23220273 |
| C | 5.37190347  | -1.89351227 | 0.43650727  |
| H | 4.91638748  | -1.88224455 | 1.43535161  |
| H | 6.42975880  | -1.63648924 | 0.58334815  |
| C | 4.71216359  | -0.79877806 | -0.42553817 |
| H | 3.74476477  | -1.15102981 | -0.80773170 |
| H | 5.33652258  | -0.60143463 | -1.30645886 |
| C | 4.49242707  | 0.51962442  | 0.34327533  |
| H | 3.69911691  | 0.36676811  | 1.08946039  |
| H | 5.39954542  | 0.76818853  | 0.91255976  |
| C | 4.13256739  | 1.71575002  | -0.55743310 |
| H | 3.33221134  | 1.42642418  | -1.25395381 |
| H | 5.00357879  | 1.96033000  | -1.18209238 |
| C | 3.68633211  | 2.97152776  | 0.21801617  |
| H | 2.70049590  | 2.78092557  | 0.66280686  |
| H | 4.37410430  | 3.13963356  | 1.05679946  |
| C | 3.63420373  | 4.23453723  | -0.66453472 |
| H | 3.18971963  | 3.97273029  | -1.63363789 |
| H | 4.66207575  | 4.55652128  | -0.88009287 |
| C | 2.85865549  | 5.47349302  | -0.09397050 |
| C | 3.04605507  | 6.65989513  | -1.06785260 |
| H | 2.73829456  | 6.41452034  | -2.08856198 |
| H | 4.10128569  | 6.94903980  | -1.10852039 |
| H | 2.46753262  | 7.52935679  | -0.73874419 |
| C | 3.45469735  | 5.88147333  | 1.26638436  |
| H | 2.94639230  | 6.76199194  | 1.67417160  |
| H | 4.51200292  | 6.13545105  | 1.14064679  |
| H | 3.39977708  | 5.08054691  | 2.00852443  |
| N | -5.26388301 | -1.64649383 | 0.99558583  |
| H | -5.88557419 | -2.40867897 | 1.29083973  |
| C | -6.05555370 | -0.53255379 | 0.39020604  |
| C | -7.14936022 | -1.14723902 | -0.46847528 |
| H | -6.49576779 | 0.06985129  | 1.18892518  |
| H | -5.38156202 | 0.09817373  | -0.19266898 |
| O | -7.38935215 | -2.33557386 | -0.46549298 |
| O | -7.78318057 | -0.21511219 | -1.17640672 |
| H | -8.49615314 | -0.62848960 | -1.69675632 |
| H | -4.67334835 | -1.32461598 | 1.78657446  |
| H | -4.59506676 | -2.03586276 | 0.31481105  |

**endo-(TM9TP)(GlyH<sup>+</sup>)**

|   |             |             |             |
|---|-------------|-------------|-------------|
| C | -5.07351229 | 1.46286931  | 0.02465855  |
| C | -4.87612216 | 0.79146364  | -1.19410703 |
| H | -5.02071091 | 1.31921362  | -2.13152247 |
| C | -4.39328931 | -0.52423021 | -1.25521856 |
| C | -4.08891198 | -1.21022094 | -0.04268028 |
| C | -4.47767252 | -0.61543977 | 1.19426421  |
| C | -4.95637875 | 0.71082397  | 1.20273466  |
| H | -5.17642459 | 1.16049647  | 2.16446174  |
| C | -4.04993825 | -1.16711554 | -2.49645446 |
| H | -4.40722253 | -0.73579290 | -3.42715987 |
| C | -3.21675398 | -2.24627136 | -2.51351561 |
| H | -2.91286091 | -2.66171648 | -3.46712097 |
| C | -2.63513530 | -2.75909093 | -1.29741257 |
| C | -3.20321590 | -2.33739449 | -0.05628657 |
| C | -2.69406420 | -2.83218902 | 1.18584897  |
| C | -3.36010512 | -2.41828508 | 2.39781421  |
| H | -3.11939607 | -2.90862123 | 3.33420090  |
| C | -4.21112081 | -1.35044675 | 2.40576203  |
| H | -4.64429976 | -1.00097516 | 3.33878720  |
| C | -1.35875036 | -3.38970683 | -1.28243111 |
| C | -0.67154556 | -3.50780067 | -0.03509546 |
| C | -1.39273321 | -3.41740610 | 1.19643615  |
| C | -0.60239869 | -3.64255762 | -2.47968416 |
| H | -1.11610850 | -3.79350242 | -3.42202800 |
| C | 0.75975696  | -3.58836013 | -2.46096439 |
| H | 1.30447563  | -3.69878265 | -3.39158448 |
| C | 1.46893151  | -3.27993369 | -1.24864284 |
| C | 0.76606740  | -3.44568852 | -0.01722468 |
| C | 1.44111489  | -3.27878302 | 1.22884161  |
| C | 0.70423128  | -3.58678878 | 2.42401040  |
| H | 1.22746494  | -3.68943464 | 3.36781354  |
| C | -0.65876650 | -3.66100084 | 2.41152299  |
| H | -1.19024168 | -3.82080441 | 3.34265868  |
| C | 2.70923072  | -2.58681224 | -1.23790388 |
| C | 3.20646805  | -2.09985044 | 0.00985539  |
| C | 2.68142336  | -2.58126572 | 1.24755169  |
| C | 3.33514662  | -2.11218036 | -2.44702015 |
| H | 3.09668532  | -2.58106157 | -3.39451547 |
| C | 4.13597834  | -1.00925662 | -2.43637350 |
| H | 4.53017063  | -0.60735858 | -3.36556709 |
| C | 4.39287385  | -0.30209037 | -1.20631474 |
| C | 4.06109277  | -0.95392833 | 0.01860234  |
| C | 4.39123141  | -0.31345695 | 1.24268940  |
| C | 4.09329462  | -1.00631067 | 2.46499273  |
| H | 4.46506214  | -0.60127909 | 3.40202985  |
| C | 3.27749477  | -2.09960472 | 2.46551403  |
| H | 3.00616748  | -2.55321196 | 3.41182199  |
| C | 4.81806897  | 1.03657816  | -1.17305494 |
| H | 4.98136811  | 1.54012413  | -2.12098083 |
| C | 4.95214967  | 1.74722551  | 0.03433018  |

|   |             |             |             |
|---|-------------|-------------|-------------|
| C | 4.83772225  | 1.02025485  | 1.22533081  |
| H | 5.00068058  | 1.50696022  | 2.17997571  |
| C | 5.07708048  | 3.28093482  | 0.00535470  |
| C | 5.36707162  | 3.87512906  | 1.39679623  |
| H | 4.58453170  | 3.64666036  | 2.12554164  |
| H | 5.43509811  | 4.96500679  | 1.32176405  |
| H | 6.31993527  | 3.50920182  | 1.79346771  |
| C | 6.22107031  | 3.71284108  | -0.94138695 |
| H | 7.17468597  | 3.28208394  | -0.61986763 |
| H | 6.32187915  | 4.80305468  | -0.93743911 |
| H | 6.04381022  | 3.40692136  | -1.97667284 |
| C | 1.16613558  | 3.90496434  | -0.47202065 |
| H | 1.12505205  | 3.25864769  | -1.36070654 |
| H | 1.18630140  | 4.93589370  | -0.85042472 |
| C | -0.11693533 | 3.70094178  | 0.35539398  |
| H | -0.08604160 | 2.70209192  | 0.81748436  |
| H | -0.12879074 | 4.40566255  | 1.19732668  |
| C | -1.41426008 | 3.85547817  | -0.45914960 |
| H | -1.34426252 | 3.25105994  | -1.37712460 |
| H | -1.50094193 | 4.89411278  | -0.80380221 |
| C | -2.69289778 | 3.46432702  | 0.30387094  |
| H | -2.62197144 | 2.40963715  | 0.61189424  |
| H | -2.74878321 | 4.03980951  | 1.23572035  |
| C | -3.97920448 | 3.66203464  | -0.51982822 |
| H | -3.80591850 | 3.29402214  | -1.53922800 |
| H | -4.17349166 | 4.73796743  | -0.61598178 |
| C | -5.28271264 | 2.98791507  | 0.02981099  |
| C | -6.45786267 | 3.36866583  | -0.90105770 |
| H | -6.27301177 | 3.08654618  | -1.94158713 |
| H | -6.61972199 | 4.45119678  | -0.87985335 |
| H | -7.38246225 | 2.88028729  | -0.57764253 |
| C | -5.59628554 | 3.53606831  | 1.43493234  |
| H | -6.52757524 | 3.11464536  | 1.82733621  |
| H | -5.72053197 | 4.62215674  | 1.38423592  |
| H | -4.80006018 | 3.33334741  | 2.15717465  |
| C | 2.46699606  | 3.60863625  | 0.29800791  |
| H | 2.49603167  | 4.22510586  | 1.20514946  |
| H | 2.45170590  | 2.56647455  | 0.63981022  |
| C | 3.73068456  | 3.86344707  | -0.54681396 |
| H | 3.86272745  | 4.94562974  | -0.67801174 |
| H | 3.57250406  | 3.45519985  | -1.55412571 |
| N | -1.32127328 | -0.05943237 | 1.04452056  |
| H | -1.21490764 | -1.04590673 | 1.32414252  |
| C | -0.77864502 | 0.15812154  | -0.33264483 |
| C | 0.72615165  | 0.32292387  | -0.19684283 |
| H | -1.03804022 | -0.69539090 | -0.95936319 |
| H | -1.22654140 | 1.05897195  | -0.75430721 |
| O | 1.26711597  | 0.34582001  | 0.88992362  |
| O | 1.30890445  | 0.45778277  | -1.37680880 |
| H | 2.28235850  | 0.53156915  | -1.26792338 |
| H | -2.32628996 | 0.15930118  | 1.10483408  |
| H | -0.78436950 | 0.50702352  | 1.71296699  |



**endo-(TM9TPH<sup>+</sup>)(Gly)**

|   |             |             |             |
|---|-------------|-------------|-------------|
| C | -5.17921975 | 1.49226431  | 0.03391619  |
| C | -5.19247204 | 0.76273612  | -1.28265454 |
| H | -4.75107360 | 1.37529435  | -2.07549808 |
| C | -4.52502618 | -0.58000419 | -1.30499015 |
| C | -4.11514799 | -1.18471712 | -0.10018117 |
| C | -4.47684948 | -0.57792138 | 1.14337089  |
| C | -4.98976923 | 0.76729806  | 1.16867203  |
| H | -5.06559356 | 1.23583603  | 2.14304773  |
| C | -4.22438335 | -1.20864020 | -2.51962865 |
| H | -4.60033152 | -0.79307879 | -3.44985675 |
| C | -3.32423801 | -2.26065804 | -2.55463373 |
| H | -3.01817479 | -2.64284240 | -3.52142130 |
| C | -2.70091173 | -2.73350408 | -1.37583323 |
| C | -3.20143605 | -2.27745887 | -0.12351009 |
| C | -2.65170240 | -2.75526339 | 1.10321789  |
| C | -3.24325115 | -2.30587175 | 2.31236432  |
| H | -2.91981637 | -2.72462505 | 3.25888039  |
| C | -4.13605332 | -1.25006075 | 2.33489304  |
| H | -4.48543690 | -0.86002095 | 3.28596450  |
| C | -1.41480463 | -3.37990586 | -1.40309128 |
| C | -0.69241389 | -3.51162066 | -0.18057942 |
| C | -1.36984402 | -3.39863282 | 1.07355291  |
| C | -0.71209391 | -3.65245602 | -2.61439228 |
| H | -1.25372626 | -3.76750124 | -3.54569550 |
| C | 0.65765155  | -3.62199987 | -2.64061081 |
| H | 1.16498665  | -3.71655245 | -3.59407909 |
| C | 1.40951941  | -3.34620406 | -1.45666095 |
| C | 0.74183127  | -3.51301444 | -0.20750306 |
| C | 1.46351233  | -3.40232460 | 1.01671803  |
| C | 0.75109499  | -3.69609061 | 2.22264622  |
| H | 1.29254348  | -3.82304659 | 3.15344390  |
| C | -0.61904352 | -3.70032003 | 2.25128680  |
| H | -1.12429669 | -3.82768034 | 3.20156460  |
| C | 2.64835612  | -2.63776474 | -1.47469109 |
| C | 3.19432502  | -2.19438468 | -0.23016321 |
| C | 2.72752287  | -2.73664156 | 1.00811226  |
| C | 3.19742136  | -2.09164116 | -2.68585091 |
| H | 2.90399978  | -2.50518705 | -3.64351255 |
| C | 3.97757639  | -0.97136005 | -2.65781406 |
| H | 4.30314008  | -0.51111153 | -3.58651040 |
| C | 4.30076323  | -0.32942803 | -1.41438068 |
| C | 4.03108353  | -1.03661815 | -0.20887536 |
| C | 4.41906231  | -0.45126046 | 1.02701008  |
| C | 4.19694055  | -1.21203625 | 2.22480449  |
| H | 4.61862811  | -0.85560811 | 3.16066170  |
| C | 3.38988616  | -2.31663963 | 2.21497418  |
| H | 3.17460648  | -2.82155016 | 3.14973095  |
| C | 4.73187343  | 1.00281696  | -1.34190746 |
| H | 4.84401359  | 1.54925331  | -2.27309889 |
| C | 4.91430238  | 1.66480019  | -0.11535711 |

|   |             |             |             |
|---|-------------|-------------|-------------|
| C | 4.85385972  | 0.88788699  | 1.04966934  |
| H | 5.06798353  | 1.33212059  | 2.01532616  |
| C | 5.04764428  | 3.19832950  | -0.09274550 |
| C | 5.33840610  | 3.74234293  | 1.31865105  |
| H | 4.55647491  | 3.48650092  | 2.03945659  |
| H | 5.40368988  | 4.83423081  | 1.28292921  |
| H | 6.29285210  | 3.36602280  | 1.70183492  |
| C | 6.19967639  | 3.64768835  | -1.02190971 |
| H | 7.14918573  | 3.20332101  | -0.70662263 |
| H | 6.30643369  | 4.73684023  | -0.98949578 |
| H | 6.02543116  | 3.36814354  | -2.06511941 |
| C | 1.13530947  | 3.86648661  | -0.55451983 |
| H | 1.07519950  | 3.23112072  | -1.45039877 |
| H | 1.17640800  | 4.89961873  | -0.92519400 |
| C | -0.14352809 | 3.68084930  | 0.28493790  |
| H | -0.11787209 | 2.70135203  | 0.78103868  |
| H | -0.15574233 | 4.41976633  | 1.09791193  |
| C | -1.44350623 | 3.78860922  | -0.53417010 |
| H | -1.38402880 | 3.09897598  | -1.38663253 |
| H | -1.52042791 | 4.80066280  | -0.95565989 |
| C | -2.71797094 | 3.45989688  | 0.26811535  |
| H | -2.64664605 | 2.43204545  | 0.63846089  |
| H | -2.76849477 | 4.11016668  | 1.15086939  |
| C | -3.99727189 | 3.62262184  | -0.57369552 |
| H | -3.82050821 | 3.19500252  | -1.56848670 |
| H | -4.18975537 | 4.69064709  | -0.73893795 |
| C | -5.32596612 | 3.01060325  | 0.00811393  |
| C | -6.49274431 | 3.41545884  | -0.92694845 |
| H | -6.31528253 | 3.12464190  | -1.96656989 |
| H | -6.61887203 | 4.50212265  | -0.91151961 |
| H | -7.43467946 | 2.96323984  | -0.59809886 |
| C | -5.60088802 | 3.59972374  | 1.40391354  |
| H | -6.53874591 | 3.21517603  | 1.81831261  |
| H | -5.68917126 | 4.68778750  | 1.32869840  |
| H | -4.79825753 | 3.38789956  | 2.11476234  |
| C | 2.43928462  | 3.54056711  | 0.19850366  |
| H | 2.47069648  | 4.11203965  | 1.13449388  |
| H | 2.43000503  | 2.48080886  | 0.48721032  |
| C | 3.70913541  | 3.81411203  | -0.62947017 |
| H | 3.85226088  | 4.89911683  | -0.71581489 |
| H | 3.54841293  | 3.44846893  | -1.65182042 |
| H | -6.24927647 | 0.64400528  | -1.57761627 |
| N | 1.00002946  | 0.18062316  | 1.29656148  |
| H | 1.52968627  | 1.01259345  | 1.53327461  |
| C | 0.60039909  | 0.16134666  | -0.11580317 |
| C | -0.92191063 | 0.28610142  | -0.22619600 |
| H | 1.05262797  | 0.96313302  | -0.70473997 |
| H | 0.87973713  | -0.77753176 | -0.59730922 |
| O | -1.51964200 | 0.37771318  | -1.27840205 |
| O | -1.53815954 | 0.26668118  | 0.96206497  |
| H | -0.78903596 | 0.21145138  | 1.61780464  |
| H | 1.55902803  | -0.62396068 | 1.55293575  |

**exo-(TM9TPH<sup>+</sup>)(Gly)**

|   |             |             |             |
|---|-------------|-------------|-------------|
| C | -5.23228881 | 1.45753429  | 0.54313191  |
| C | -5.28455659 | 0.73403406  | -0.77218601 |
| H | -4.96288147 | 1.36366324  | -1.60572454 |
| C | -4.52781157 | -0.55905634 | -0.83337610 |
| C | -4.05121702 | -1.15622087 | 0.35486585  |
| C | -4.41142761 | -0.58382049 | 1.61872492  |
| C | -4.97989663 | 0.74018997  | 1.67023590  |
| H | -5.02362360 | 1.20738678  | 2.64759906  |
| C | -4.21541228 | -1.14433503 | -2.06579458 |
| H | -4.61665342 | -0.70877113 | -2.97523838 |
| C | -3.27998863 | -2.16901482 | -2.13237519 |
| H | -2.97602349 | -2.51949015 | -3.11208794 |
| C | -2.62591095 | -2.65173896 | -0.97730535 |
| C | -3.09724014 | -2.21405768 | 0.29439497  |
| C | -2.50315253 | -2.69280073 | 1.50221628  |
| C | -3.06663780 | -2.26990807 | 2.72951368  |
| H | -2.69489926 | -2.67841597 | 3.66250376  |
| C | -4.00084704 | -1.24732203 | 2.78984930  |
| H | -4.33179806 | -0.87815873 | 3.75583956  |
| C | -1.33289822 | -3.29163561 | -1.04583857 |
| C | -0.56914702 | -3.40812129 | 0.15283054  |
| C | -1.20730151 | -3.31259832 | 1.42870213  |
| C | -0.67146492 | -3.57011832 | -2.27446840 |
| H | -1.24232471 | -3.69200924 | -3.18745230 |
| C | 0.70006204  | -3.53386487 | -2.34536522 |
| H | 1.17370872  | -3.63134173 | -3.31581398 |
| C | 1.48773881  | -3.24361412 | -1.19337580 |
| C | 0.86071203  | -3.39088015 | 0.07822263  |
| C | 1.61714158  | -3.25546705 | 1.27807728  |
| C | 0.95371056  | -3.55985711 | 2.50395160  |
| H | 1.52735004  | -3.66667499 | 3.41784933  |
| C | -0.41665197 | -3.60255412 | 2.57786722  |
| H | -0.88618147 | -3.73746046 | 3.54521792  |
| C | 2.73554450  | -2.55038779 | -1.26193604 |
| C | 3.30735928  | -2.06788293 | -0.04481070 |
| C | 2.86579012  | -2.56286734 | 1.22181760  |
| C | 3.28069554  | -2.07236044 | -2.50092320 |
| H | 2.96592983  | -2.52042459 | -3.43621736 |
| C | 4.09319299  | -0.97371337 | -2.53138698 |
| H | 4.42034012  | -0.56447778 | -3.48326978 |
| C | 4.44446701  | -0.28574754 | -1.32240200 |
| C | 4.16848032  | -0.93139643 | -0.08464711 |
| C | 4.58058627  | -0.30239951 | 1.12084216  |
| C | 4.35783707  | -1.00190523 | 2.35263056  |
| H | 4.78549713  | -0.60305620 | 3.26841111  |
| C | 3.54089370  | -2.09767931 | 2.39936471  |
| H | 3.32496328  | -2.55237938 | 3.35919979  |
| C | 4.89033008  | 1.04415237  | -1.31249630 |
| H | 4.99045571  | 1.55267745  | -2.26626274 |
| C | 5.06816734  | 1.75796142  | -0.11576066 |

|   |             |            |             |
|---|-------------|------------|-------------|
| C | 5.02616766  | 1.03129401 | 1.08108497  |
| H | 5.23897234  | 1.51961840 | 2.02519488  |
| C | 5.09300985  | 3.29348312 | -0.14437262 |
| C | 5.39993297  | 3.90493116 | 1.23649563  |
| H | 4.64930407  | 3.64778921 | 1.98909808  |
| H | 5.41932476  | 4.99614712 | 1.15566809  |
| H | 6.37940456  | 3.58274521 | 1.60613283  |
| C | 6.15585598  | 3.81536856 | -1.13715997 |
| H | 7.15984107  | 3.50331877 | -0.83140522 |
| H | 6.13491856  | 4.90979500 | -1.16914331 |
| H | 5.98638260  | 3.45736435 | -2.15683934 |
| C | 1.11426035  | 3.73727578 | -0.42593610 |
| H | 1.06432057  | 3.52716853 | -1.50414695 |
| H | 1.07733601  | 4.83126100 | -0.32646347 |
| C | -0.11808623 | 3.12103383 | 0.26155056  |
| H | -0.08522989 | 2.02791340 | 0.14195547  |
| H | -0.06273922 | 3.31119711 | 1.34319652  |
| C | -1.46207826 | 3.64719810 | -0.27519218 |
| H | -1.50763681 | 3.48156362 | -1.36115658 |
| H | -1.50811524 | 4.73569218 | -0.13004467 |
| C | -2.68859511 | 2.99198811 | 0.38632653  |
| H | -2.63059186 | 1.90531644 | 0.23768467  |
| H | -2.63907406 | 3.15069422 | 1.47145160  |
| C | -4.02750088 | 3.51895178 | -0.16296427 |
| H | -4.07237964 | 3.30947191 | -1.23894389 |
| H | -4.05572805 | 4.61224367 | -0.06710203 |
| C | -5.34253489 | 2.97462360 | 0.51625337  |
| C | -6.55525341 | 3.42493054 | -0.33246674 |
| H | -6.52559132 | 3.02738857 | -1.34996938 |
| H | -6.57307449 | 4.51769141 | -0.39875572 |
| H | -7.49335556 | 3.09914325 | 0.12989137  |
| C | -5.48531860 | 3.58503146 | 1.92331203  |
| H | -6.37428859 | 3.20060427 | 2.43441723  |
| H | -5.59350270 | 4.67064911 | 1.84042713  |
| H | -4.61552511 | 3.39136309 | 2.55694165  |
| C | 2.45423624  | 3.21761967 | 0.12819416  |
| H | 2.52243003  | 3.47285686 | 1.19372970  |
| H | 2.45732770  | 2.12135457 | 0.07532081  |
| C | 3.67685999  | 3.76994749 | -0.62918445 |
| H | 3.66658166  | 4.86762738 | -0.58591265 |
| H | 3.57229789  | 3.50578178 | -1.68993030 |
| H | -6.34611501 | 0.54433503 | -1.00558167 |
| N | -8.68457385 | 2.19345293 | -5.33825293 |
| H | -8.39196710 | 1.59675987 | -3.58712651 |
| C | -7.22919765 | 2.04668478 | -5.46859545 |
| C | -6.62291744 | 1.53800061 | -4.15386711 |
| H | -6.94514409 | 1.33783277 | -6.25269759 |
| H | -6.73366026 | 2.99291070 | -5.70746106 |
| O | -7.52034972 | 1.34797141 | -3.17891110 |
| O | -5.43573641 | 1.32864125 | -4.00402037 |
| H | -9.20170978 | 1.58580019 | -5.96412078 |
| H | -9.00186674 | 3.14517491 | -5.48559759 |

**exo-(TM9TP)(GlyH<sup>+</sup>)**

|   |             |             |             |
|---|-------------|-------------|-------------|
| C | 3.20890365  | -4.58038869 | 0.03211106  |
| C | 3.43049182  | -3.86410137 | -1.15632714 |
| H | 3.34396984  | -4.36595093 | -2.11487444 |
| C | 3.62690847  | -2.47686371 | -1.15923852 |
| C | 3.60668050  | -1.77233053 | 0.07840386  |
| C | 3.62067649  | -2.51718601 | 1.28958620  |
| C | 3.42504712  | -3.90866219 | 1.24184119  |
| H | 3.34138814  | -4.43812278 | 2.18397871  |
| C | 3.68929898  | -1.70840040 | -2.37199149 |
| H | 3.83991050  | -2.22776783 | -3.31437457 |
| C | 3.46850456  | -0.36224360 | -2.35913839 |
| H | 3.43798799  | 0.17564459  | -3.29960315 |
| C | 3.14193510  | 0.32144230  | -1.13513316 |
| C | 3.35834528  | -0.36684768 | 0.10001347  |
| C | 3.12406215  | 0.27841650  | 1.35428752  |
| C | 3.43680541  | -0.44481271 | 2.55764651  |
| H | 3.39055595  | 0.05835170  | 3.51689030  |
| C | 3.66618307  | -1.79048621 | 2.52706416  |
| H | 3.80766277  | -2.34043044 | 3.45338689  |
| C | 2.36649377  | 1.51351306  | -1.11936497 |
| C | 1.80462889  | 1.93976742  | 0.12269041  |
| C | 2.33939785  | 1.46597015  | 1.36059037  |
| C | 1.89331587  | 2.16512710  | -2.31316967 |
| H | 2.43311679  | 2.04145363  | -3.24533672 |
| C | 0.70683328  | 2.84000345  | -2.31577118 |
| H | 0.32730857  | 3.24010472  | -3.24915092 |
| C | -0.10116438 | 2.90933473  | -1.12523144 |
| C | 0.54957723  | 2.65048192  | 0.11966211  |
| C | -0.14464739 | 2.84899641  | 1.35590159  |
| C | 0.62655999  | 2.72835098  | 2.56477565  |
| H | 0.21138670  | 3.06486419  | 3.50859745  |
| C | 1.82947702  | 2.06657385  | 2.56650328  |
| H | 2.33088896  | 1.89315500  | 3.51255278  |
| C | -1.52301274 | 2.93719155  | -1.14940036 |
| C | -2.22910233 | 2.74807595  | 0.08002918  |
| C | -1.56677883 | 2.88570490  | 1.33989326  |
| C | -2.26784354 | 2.85764201  | -2.37840099 |
| H | -1.79080170 | 3.12523080  | -3.31405417 |
| C | -3.52546916 | 2.32920342  | -2.40216563 |
| H | -4.03977982 | 2.18700726  | -3.34861402 |
| C | -4.15159432 | 1.86258529  | -1.19600248 |
| C | -3.55216952 | 2.21398647  | 0.04717569  |
| C | -4.20006016 | 1.82737983  | 1.25246900  |
| C | -3.61696660 | 2.24698177  | 2.49569438  |
| H | -4.16576590 | 2.07394104  | 3.41731541  |
| C | -2.35432343 | 2.76460489  | 2.53725810  |
| H | -1.91015920 | 2.99033263  | 3.50017020  |
| C | -5.22426521 | 0.96097899  | -1.20392228 |
| H | -5.59745469 | 0.62528973  | -2.16629250 |
| C | -5.72391414 | 0.39079418  | -0.02097623 |

|   |             |             |             |
|---|-------------|-------------|-------------|
| C | -5.27699606 | 0.92578557  | 1.19391187  |
| H | -5.68968706 | 0.57235847  | 2.13184281  |
| C | -6.56309760 | -0.89371426 | -0.09406926 |
| C | -7.11944143 | -1.31562802 | 1.27969325  |
| H | -6.33170501 | -1.52958192 | 2.00728734  |
| H | -7.71481563 | -2.22705263 | 1.16736461  |
| H | -7.77232519 | -0.54261865 | 1.69941330  |
| C | -7.76181758 | -0.72011703 | -1.05385909 |
| H | -8.43394481 | 0.06777195  | -0.69817312 |
| H | -8.33276131 | -1.65264047 | -1.11415230 |
| H | -7.44917395 | -0.46451179 | -2.07046954 |
| C | -3.42654928 | -3.34616798 | -0.58258927 |
| H | -3.25019048 | -3.06805742 | -1.63186237 |
| H | -3.97410825 | -4.29887411 | -0.60759007 |
| C | -2.07027225 | -3.55551438 | 0.11500191  |
| H | -1.53523384 | -2.59493360 | 0.15211661  |
| H | -2.24181898 | -3.84924410 | 1.16065589  |
| C | -1.17100714 | -4.60320938 | -0.56579884 |
| H | -1.01601942 | -4.31402647 | -1.61545499 |
| H | -1.69262781 | -5.57038405 | -0.58988737 |
| C | 0.19966700  | -4.77428216 | 0.11503135  |
| H | 0.69604457  | -3.79623915 | 0.15678859  |
| H | 0.04501872  | -5.08439049 | 1.15668795  |
| C | 1.11264138  | -5.78265530 | -0.60736909 |
| H | 1.20051089  | -5.47717593 | -1.65843412 |
| H | 0.62957896  | -6.76927919 | -0.61628572 |
| C | 2.56135184  | -5.97192713 | -0.03196902 |
| C | 3.34927725  | -6.90749409 | -0.97650614 |
| H | 3.40989753  | -6.51628494 | -1.99626130 |
| H | 2.85903214  | -7.88515996 | -1.03179057 |
| H | 4.37024297  | -7.05916899 | -0.61087747 |
| C | 2.48590117  | -6.65296269 | 1.34827879  |
| H | 3.48371454  | -6.79639746 | 1.77697531  |
| H | 2.02576050  | -7.64034203 | 1.24279604  |
| H | 1.88363622  | -6.08842418 | 2.06546527  |
| C | -4.30099324 | -2.26707443 | 0.08251593  |
| H | -4.49526801 | -2.55642240 | 1.12352807  |
| H | -3.73094869 | -1.33015806 | 0.12600091  |
| C | -5.63047048 | -2.02493783 | -0.65647622 |
| H | -6.21324683 | -2.95608848 | -0.67107212 |
| H | -5.40456069 | -1.79043499 | -1.70519580 |
| N | 2.51397696  | 4.82735052  | 0.96328435  |
| H | 2.41495686  | 5.80709651  | 1.25476043  |
| C | 3.85918747  | 4.59897609  | 0.35291839  |
| C | 4.19479969  | 5.80651876  | -0.50772631 |
| H | 4.59925291  | 4.48487011  | 1.14908345  |
| H | 3.82698830  | 3.67616378  | -0.22935443 |
| O | 3.52480271  | 6.81691165  | -0.50209912 |
| O | 5.29878213  | 5.59477637  | -1.22051294 |
| H | 5.50878723  | 6.39095836  | -1.74200652 |
| H | 2.32941533  | 4.18559201  | 1.75830608  |
| H | 1.76289260  | 4.62674104  | 0.28700204  |

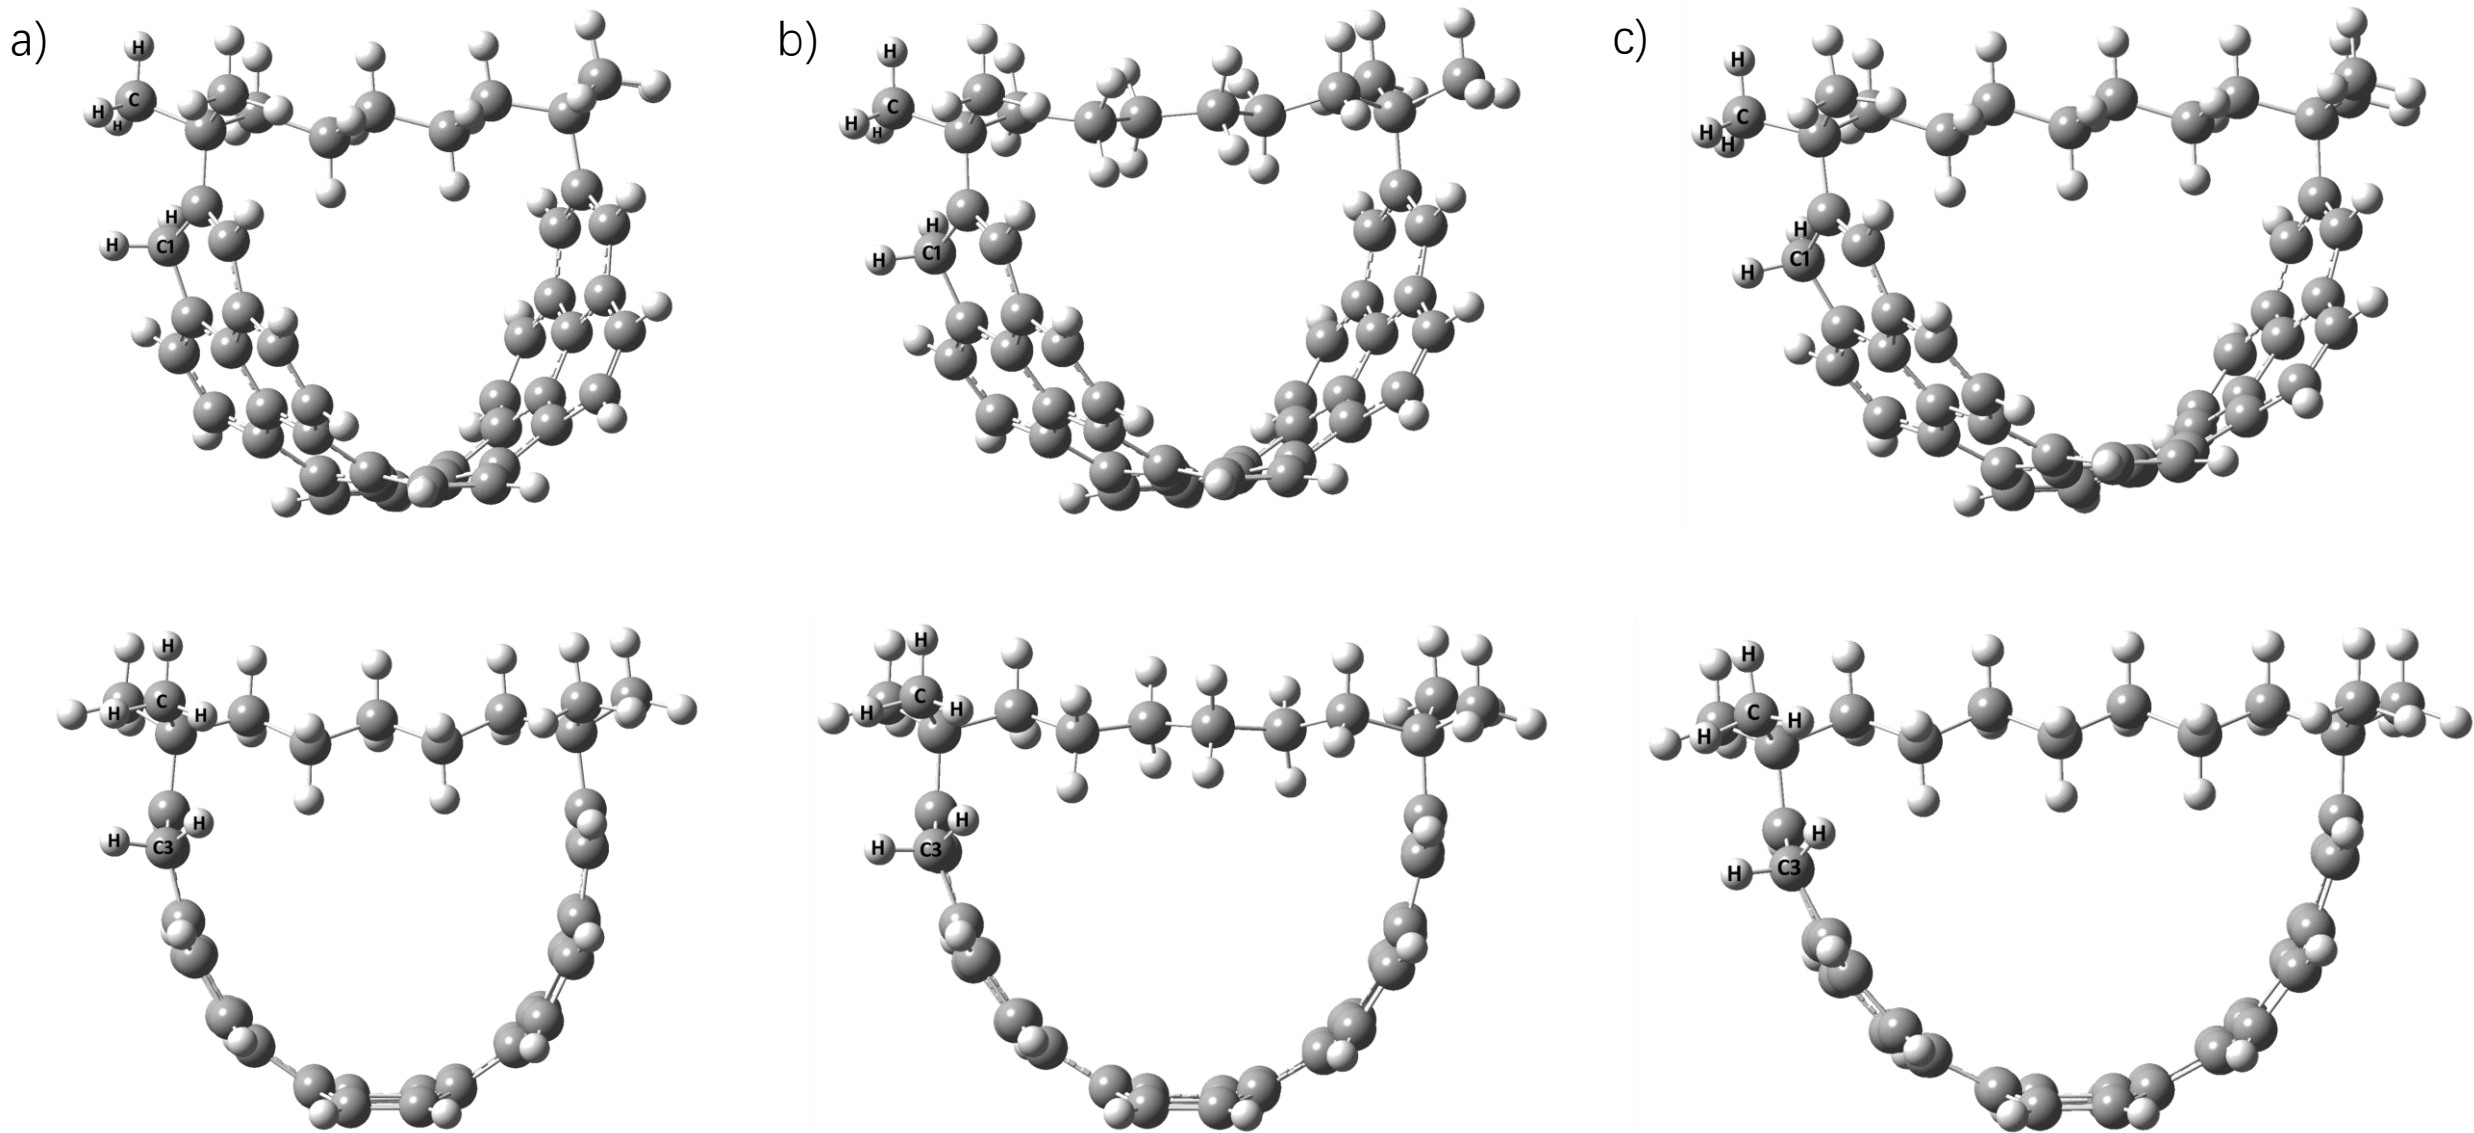

**Figure S1.** Computed structures of a) TM7TPH<sup>+</sup>; b) TM8TPH<sup>+</sup>; c) TM9TPH<sup>+</sup> where the protonation sites are at carbon 1 (C1) and carbon 3 (C3) at the level of B3LYP-D3/6-31+G(d,p). The two hydrogens on C1 and the two hydrogens of methyl group close to C1 are staggered. When the protonation site is on C3, the two hydrogens on C3 are face to face with the two hydrogens of the methyl group right above C3.

# Another perspective view of protonation on C1

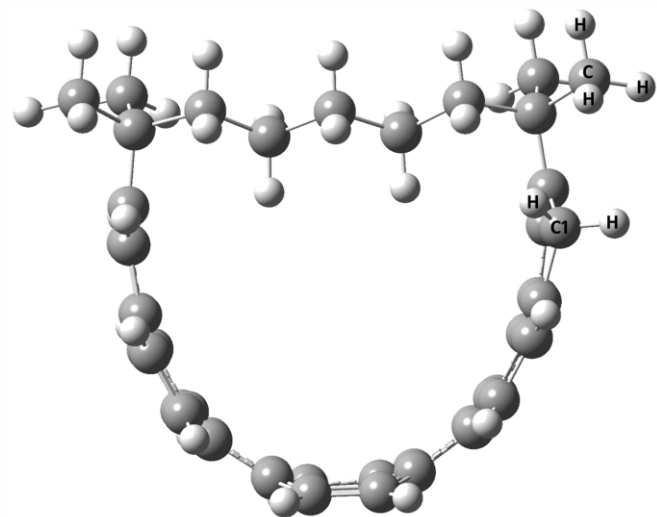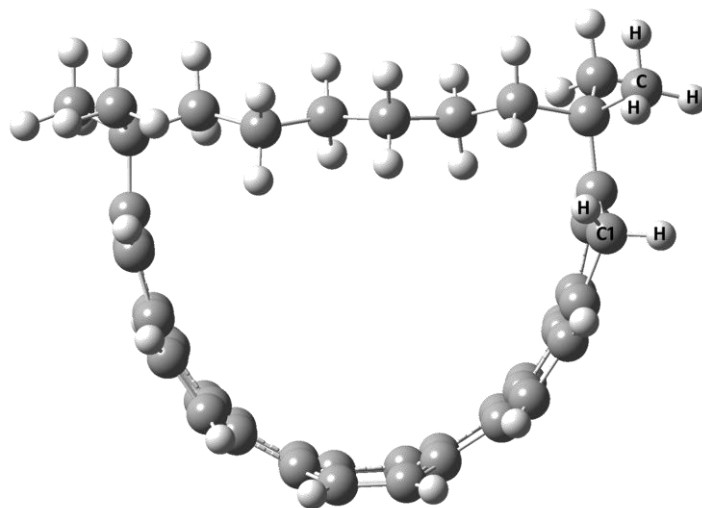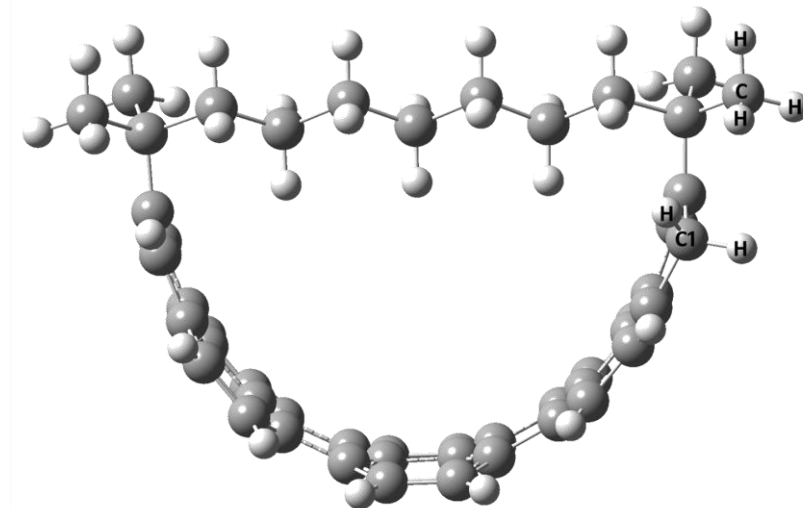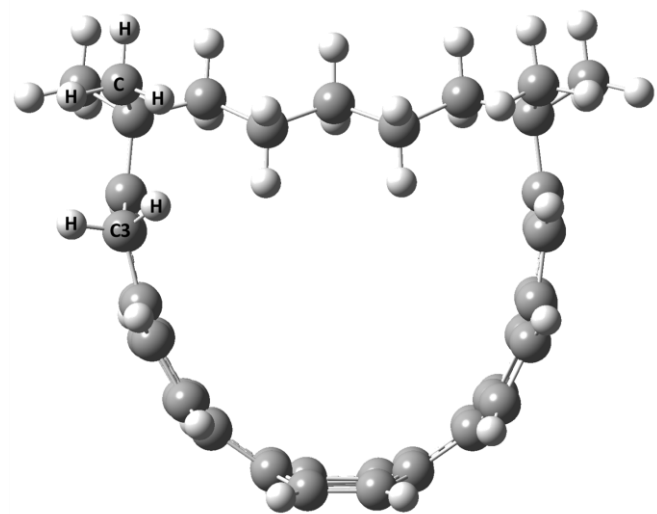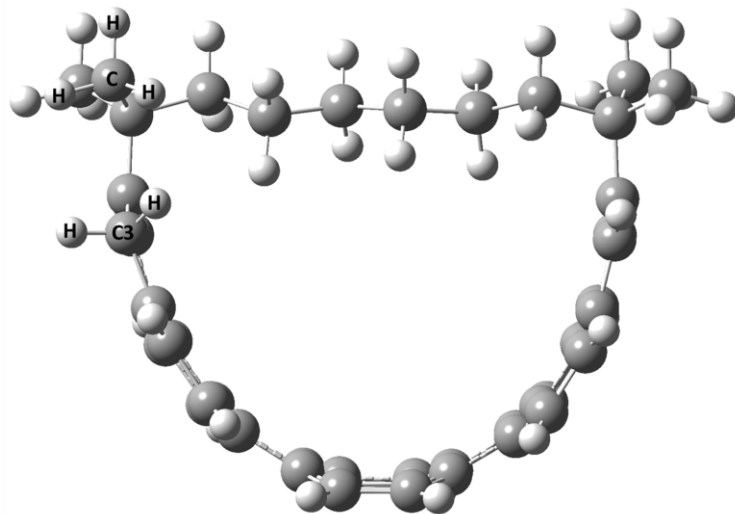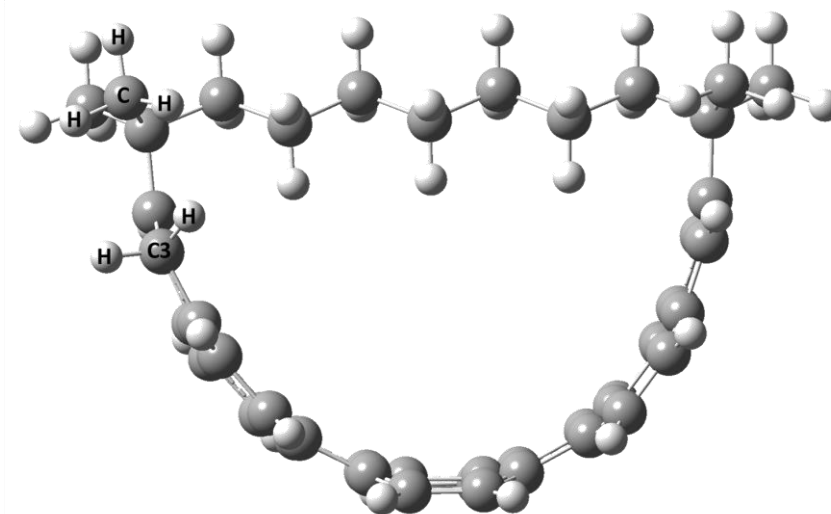



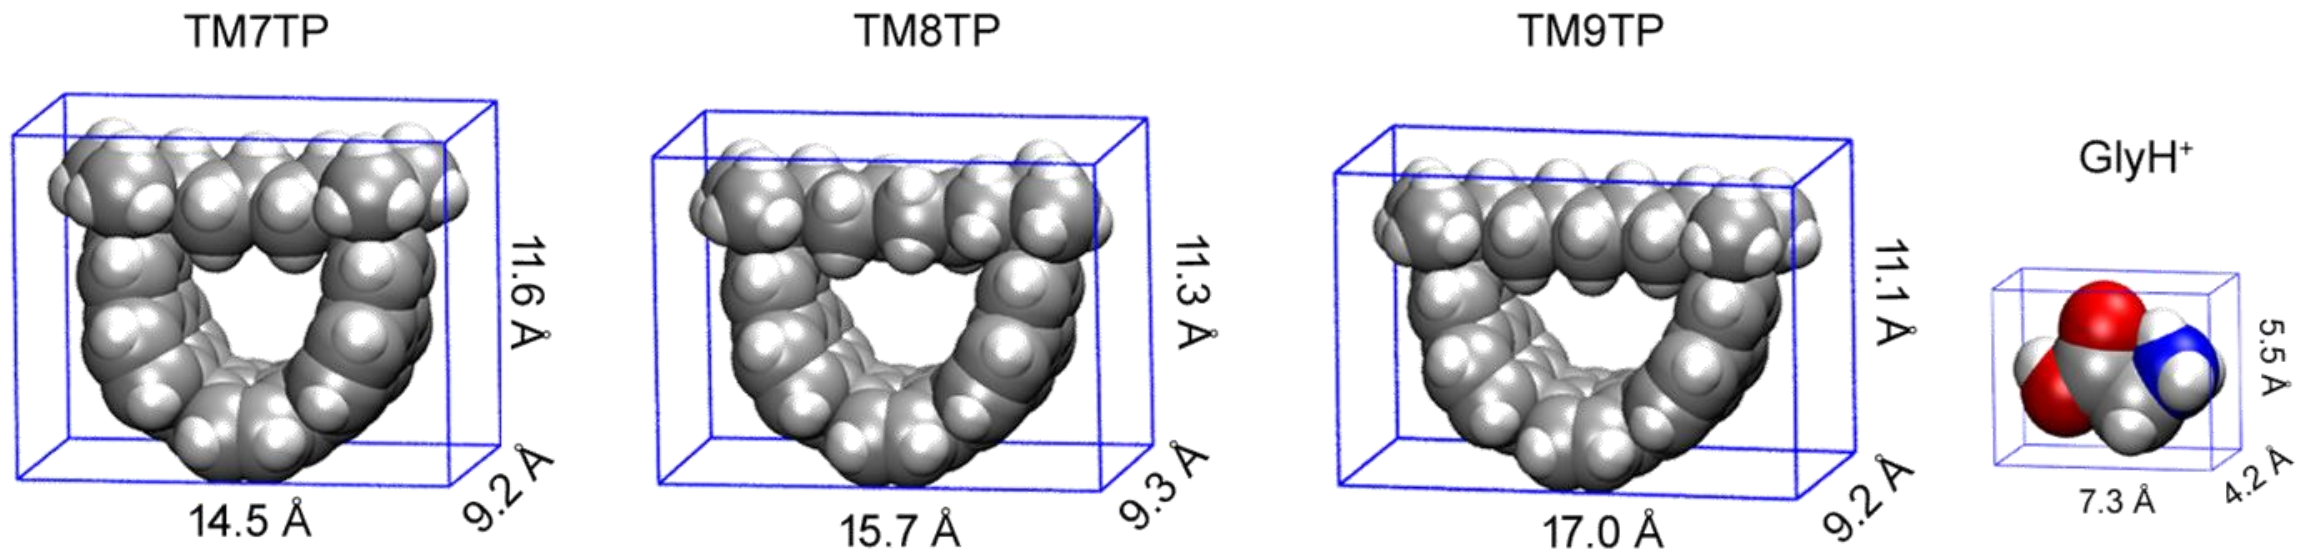

**Figure S2.** Boxes that enclose the Van de Waals surfaces ( $\rho = 0.001$  a.u.) of TM<sub>n</sub>TP ( $n=7, 8, 9$ ), and protonated glycine.

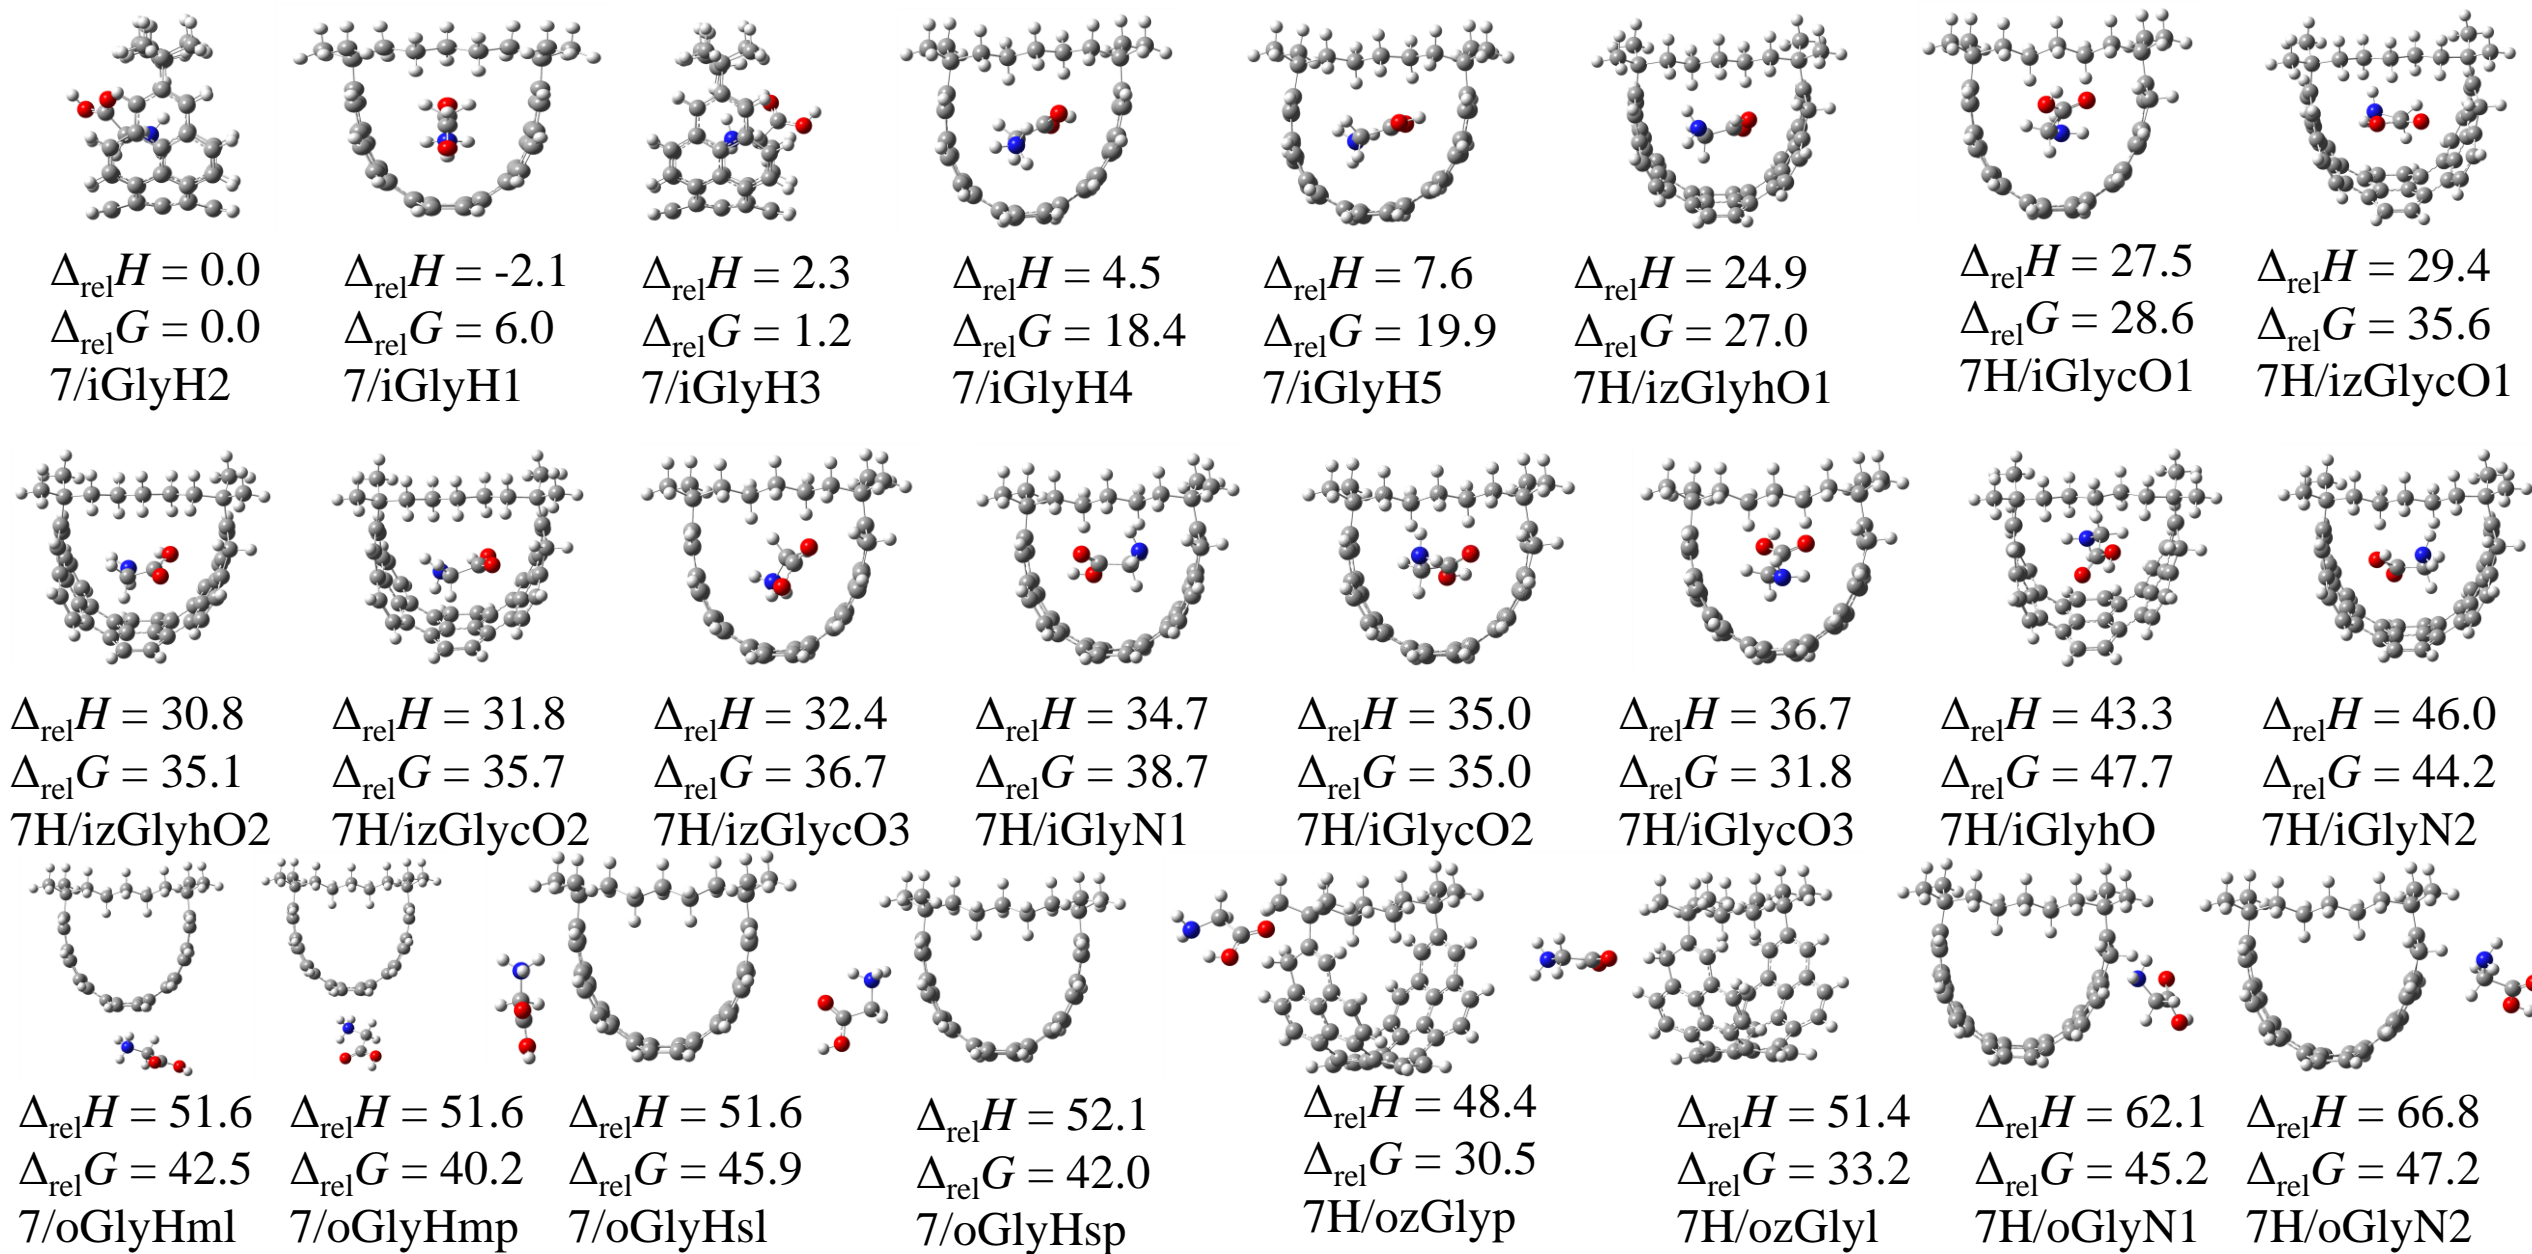

**Figure S3.** Computed structures and relative energies to the global minimum structure of [(TM7TP)(Gly)]H<sup>+</sup> at the level of B3LYP-D3/6-31+G(d,p). Energies are listed in kJ mol<sup>-1</sup> at 298 K and 1 atm.

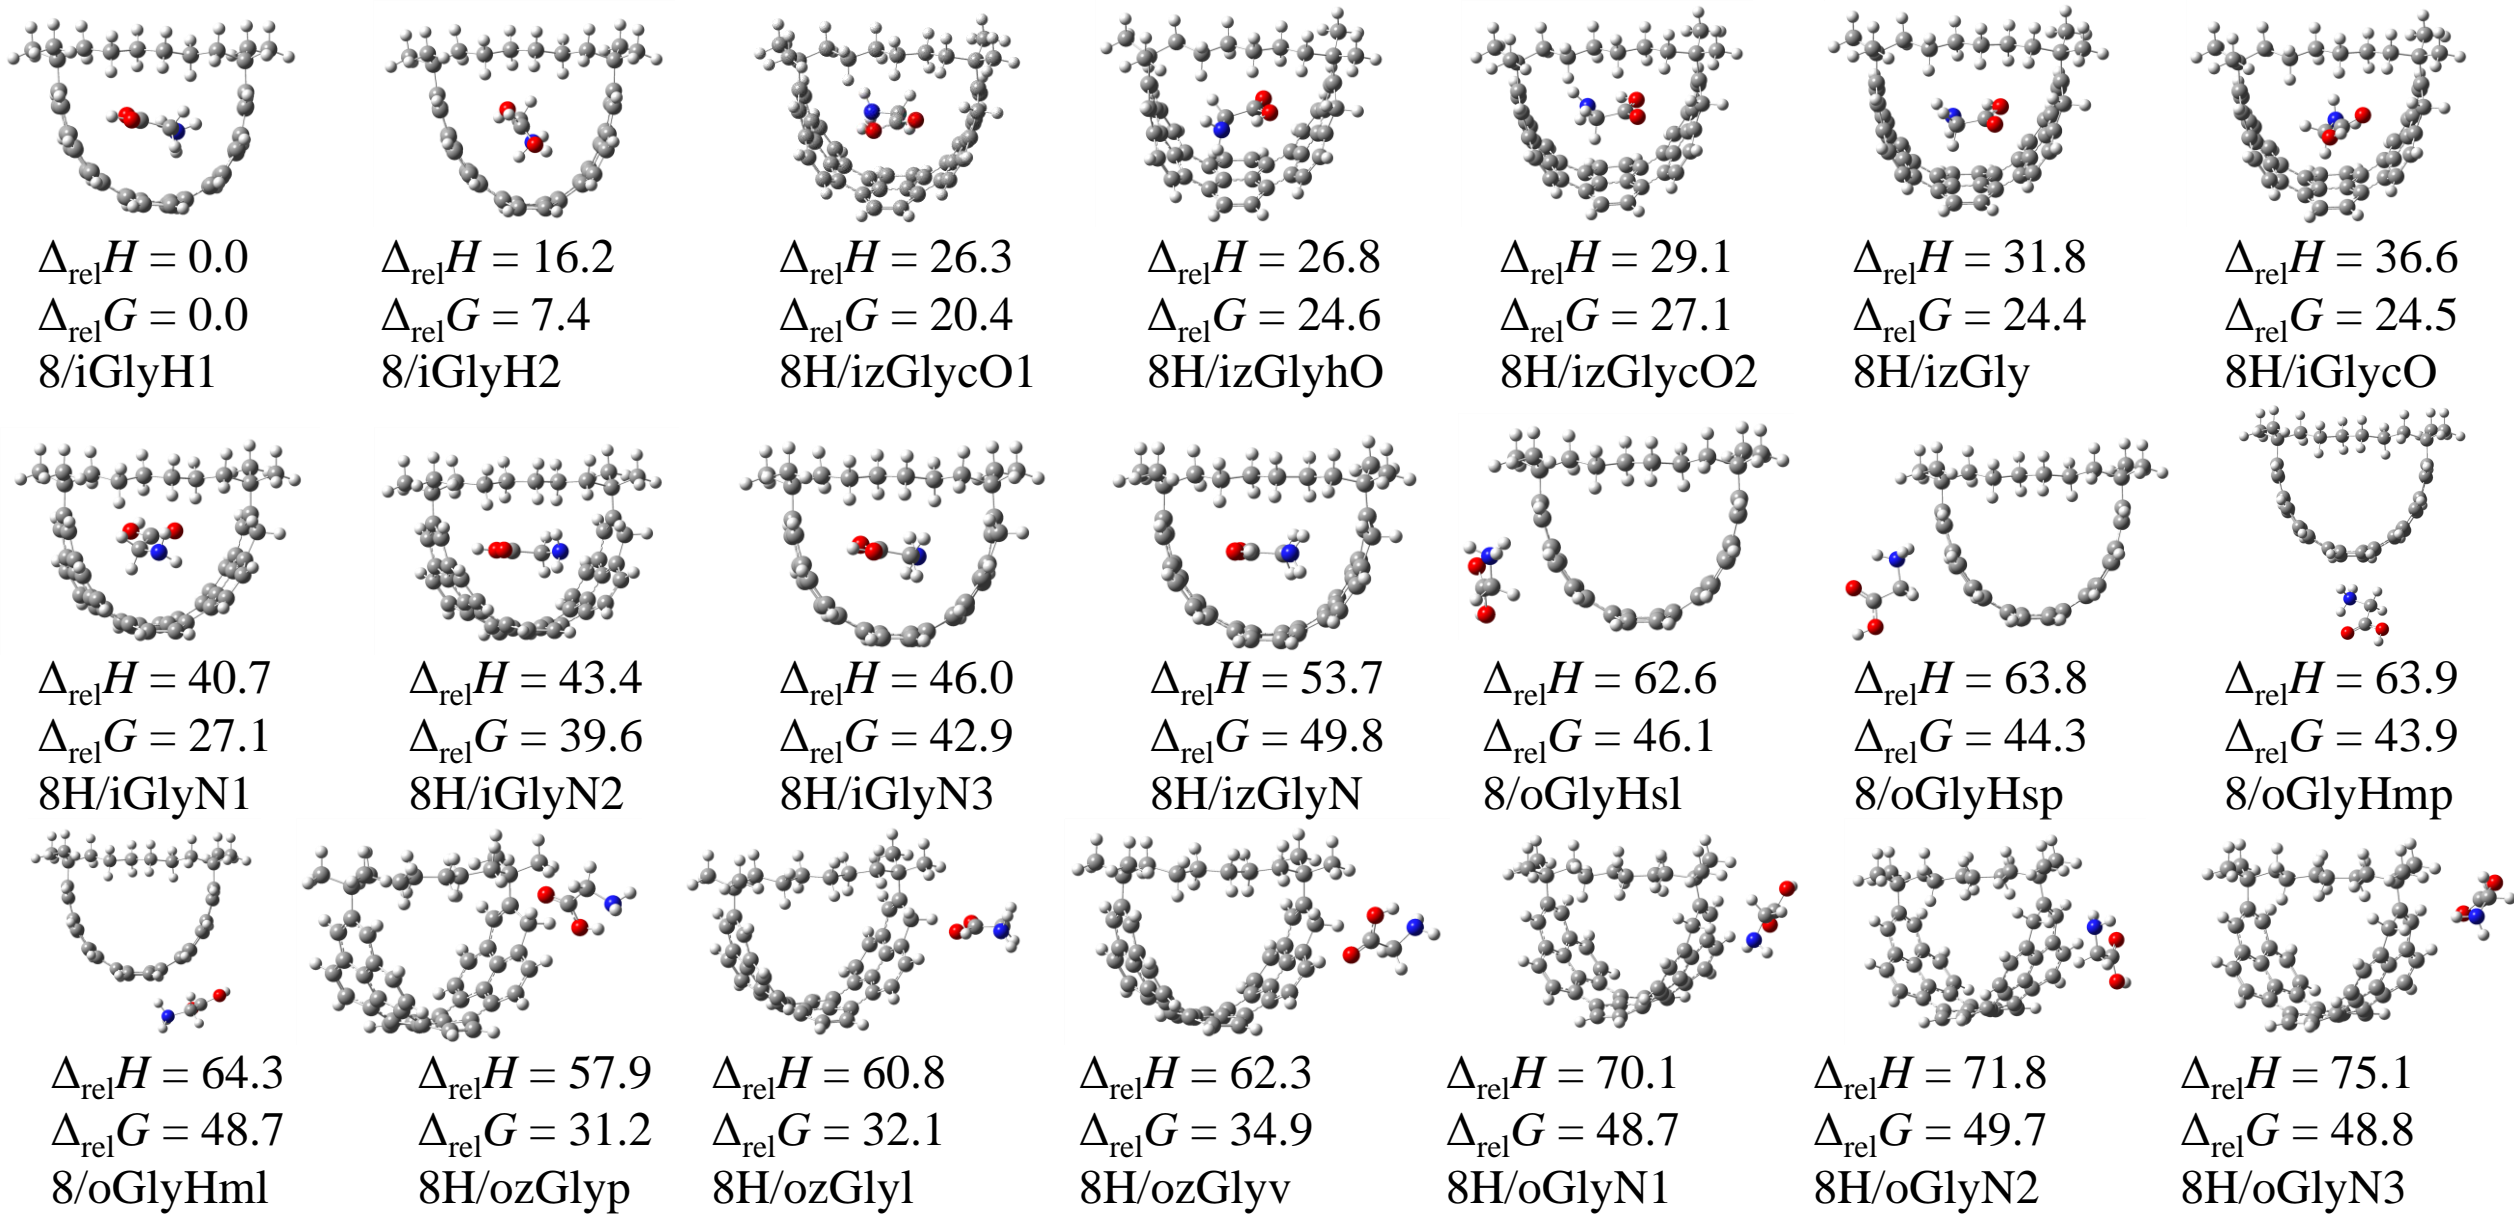

**Figure S4.** Computed structures and relative energies to the global minimum structure of  $[(\text{TM8TP})(\text{Gly})]\text{H}^+$  at the level of B3LYP-D3/6-31+G(d,p). Energies are listed in  $\text{kJ mol}^{-1}$  at 298 K and 1 atm.

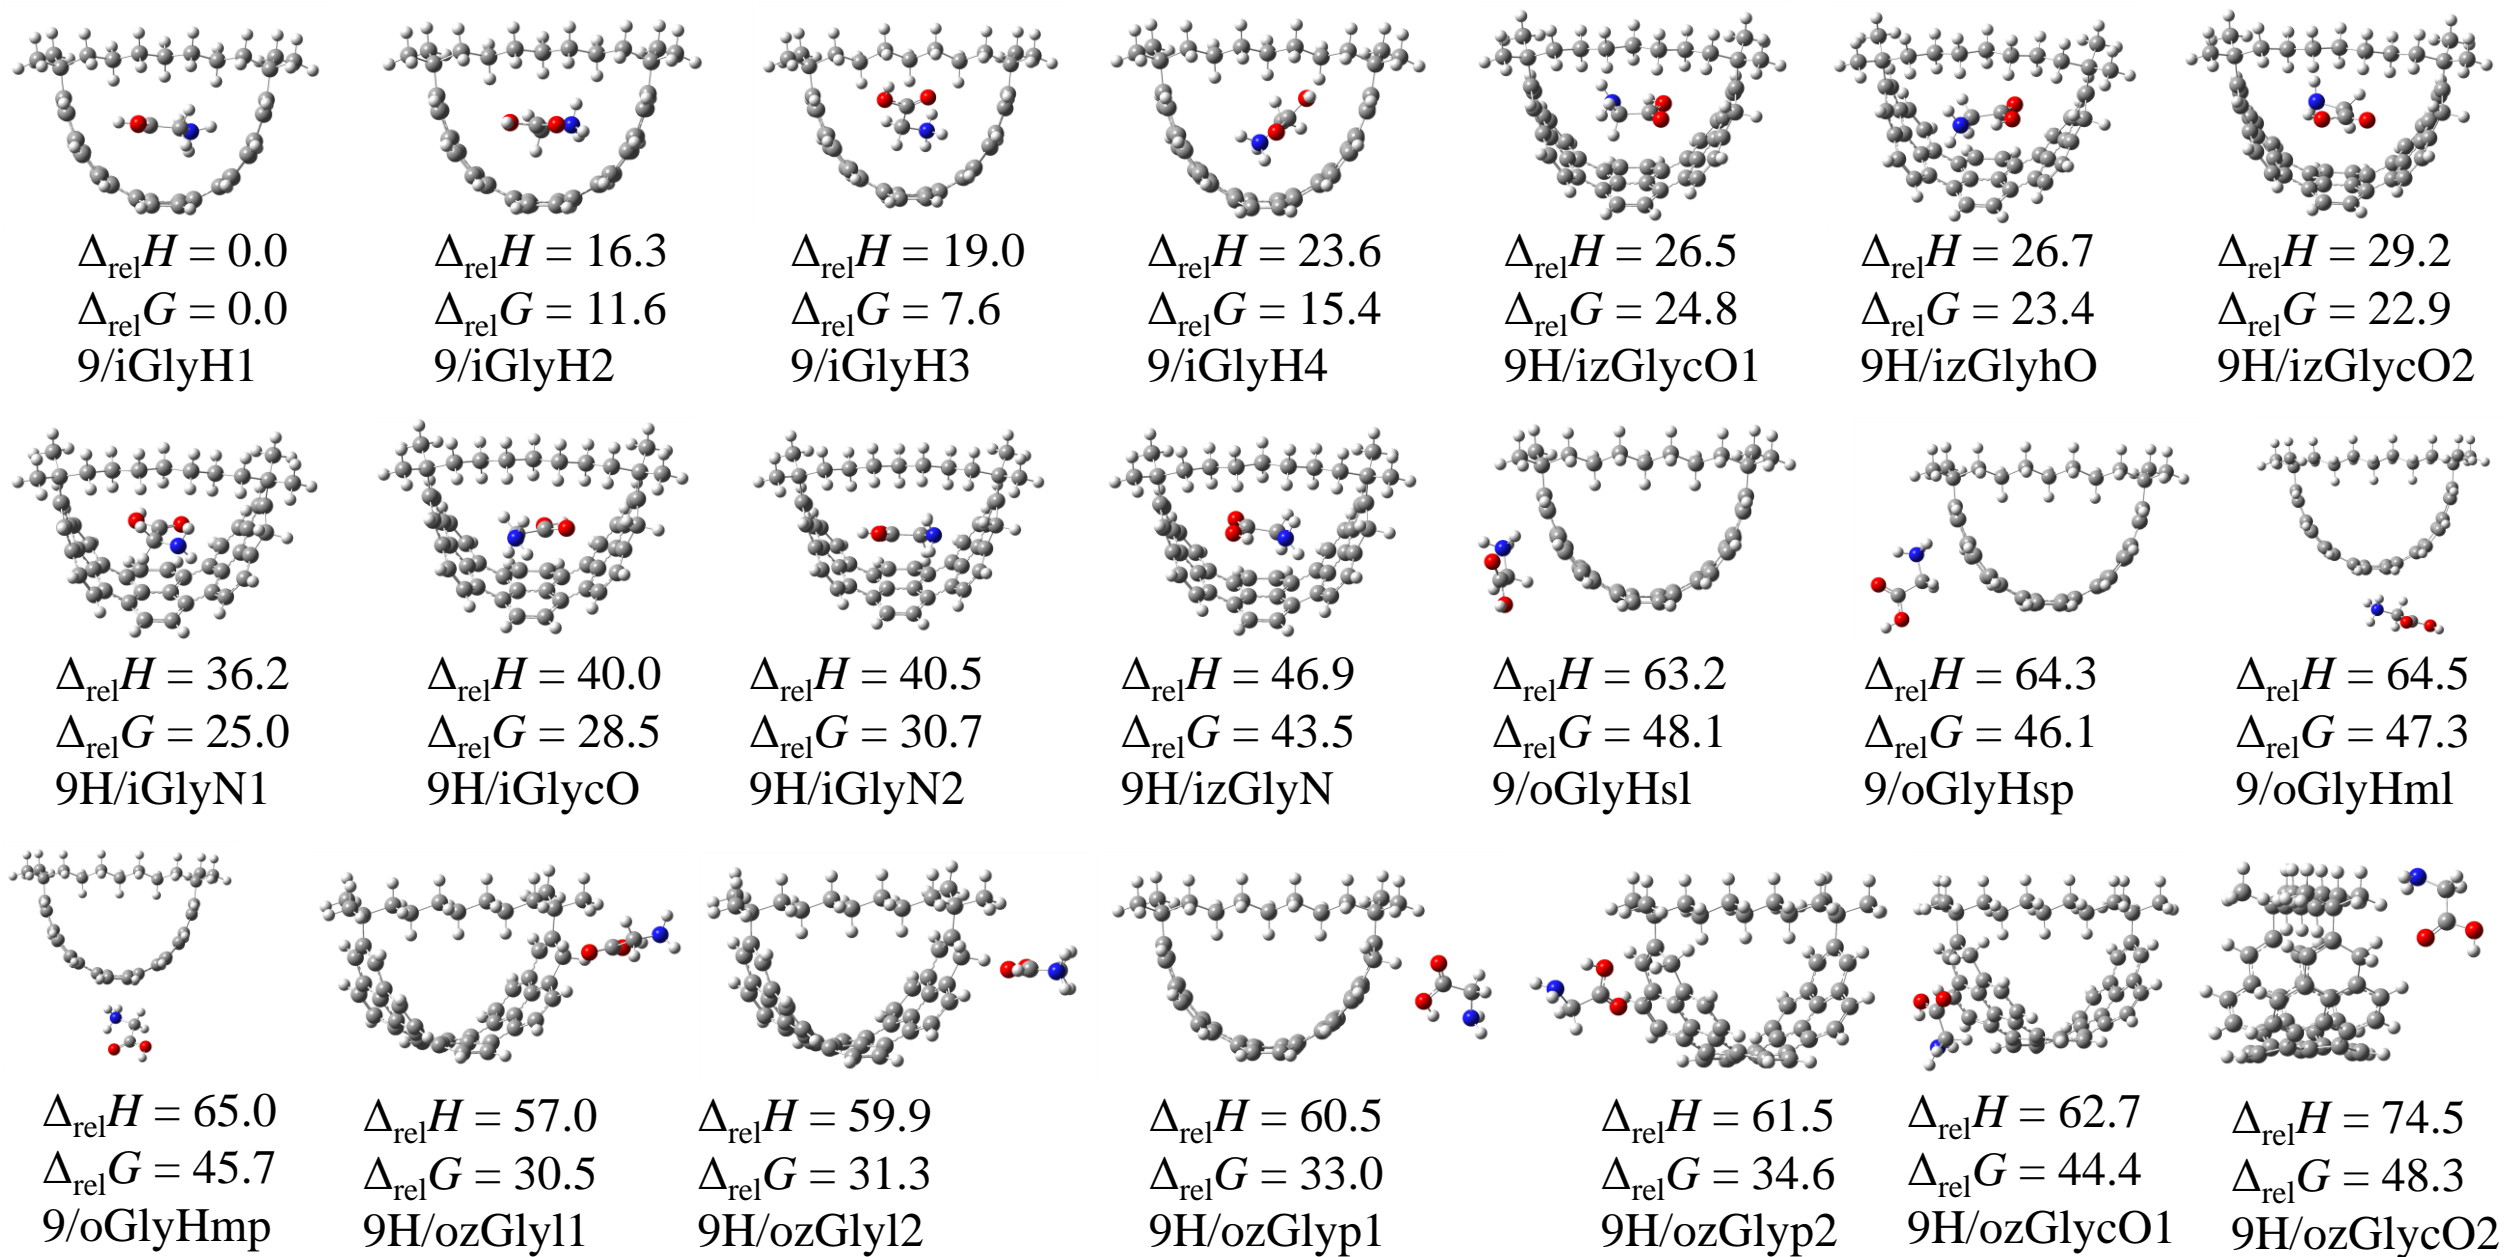

**Figure S5.** Computed structures and relative energies to the global minimum structure of  $[(\text{TM9TP})(\text{Gly})]\text{H}^+$  at the level of B3LYP-D3/6-31+G(d,p). Energies are listed in  $\text{kJ mol}^{-1}$  at 298 K and 1 atm.



Energy kJ/mol

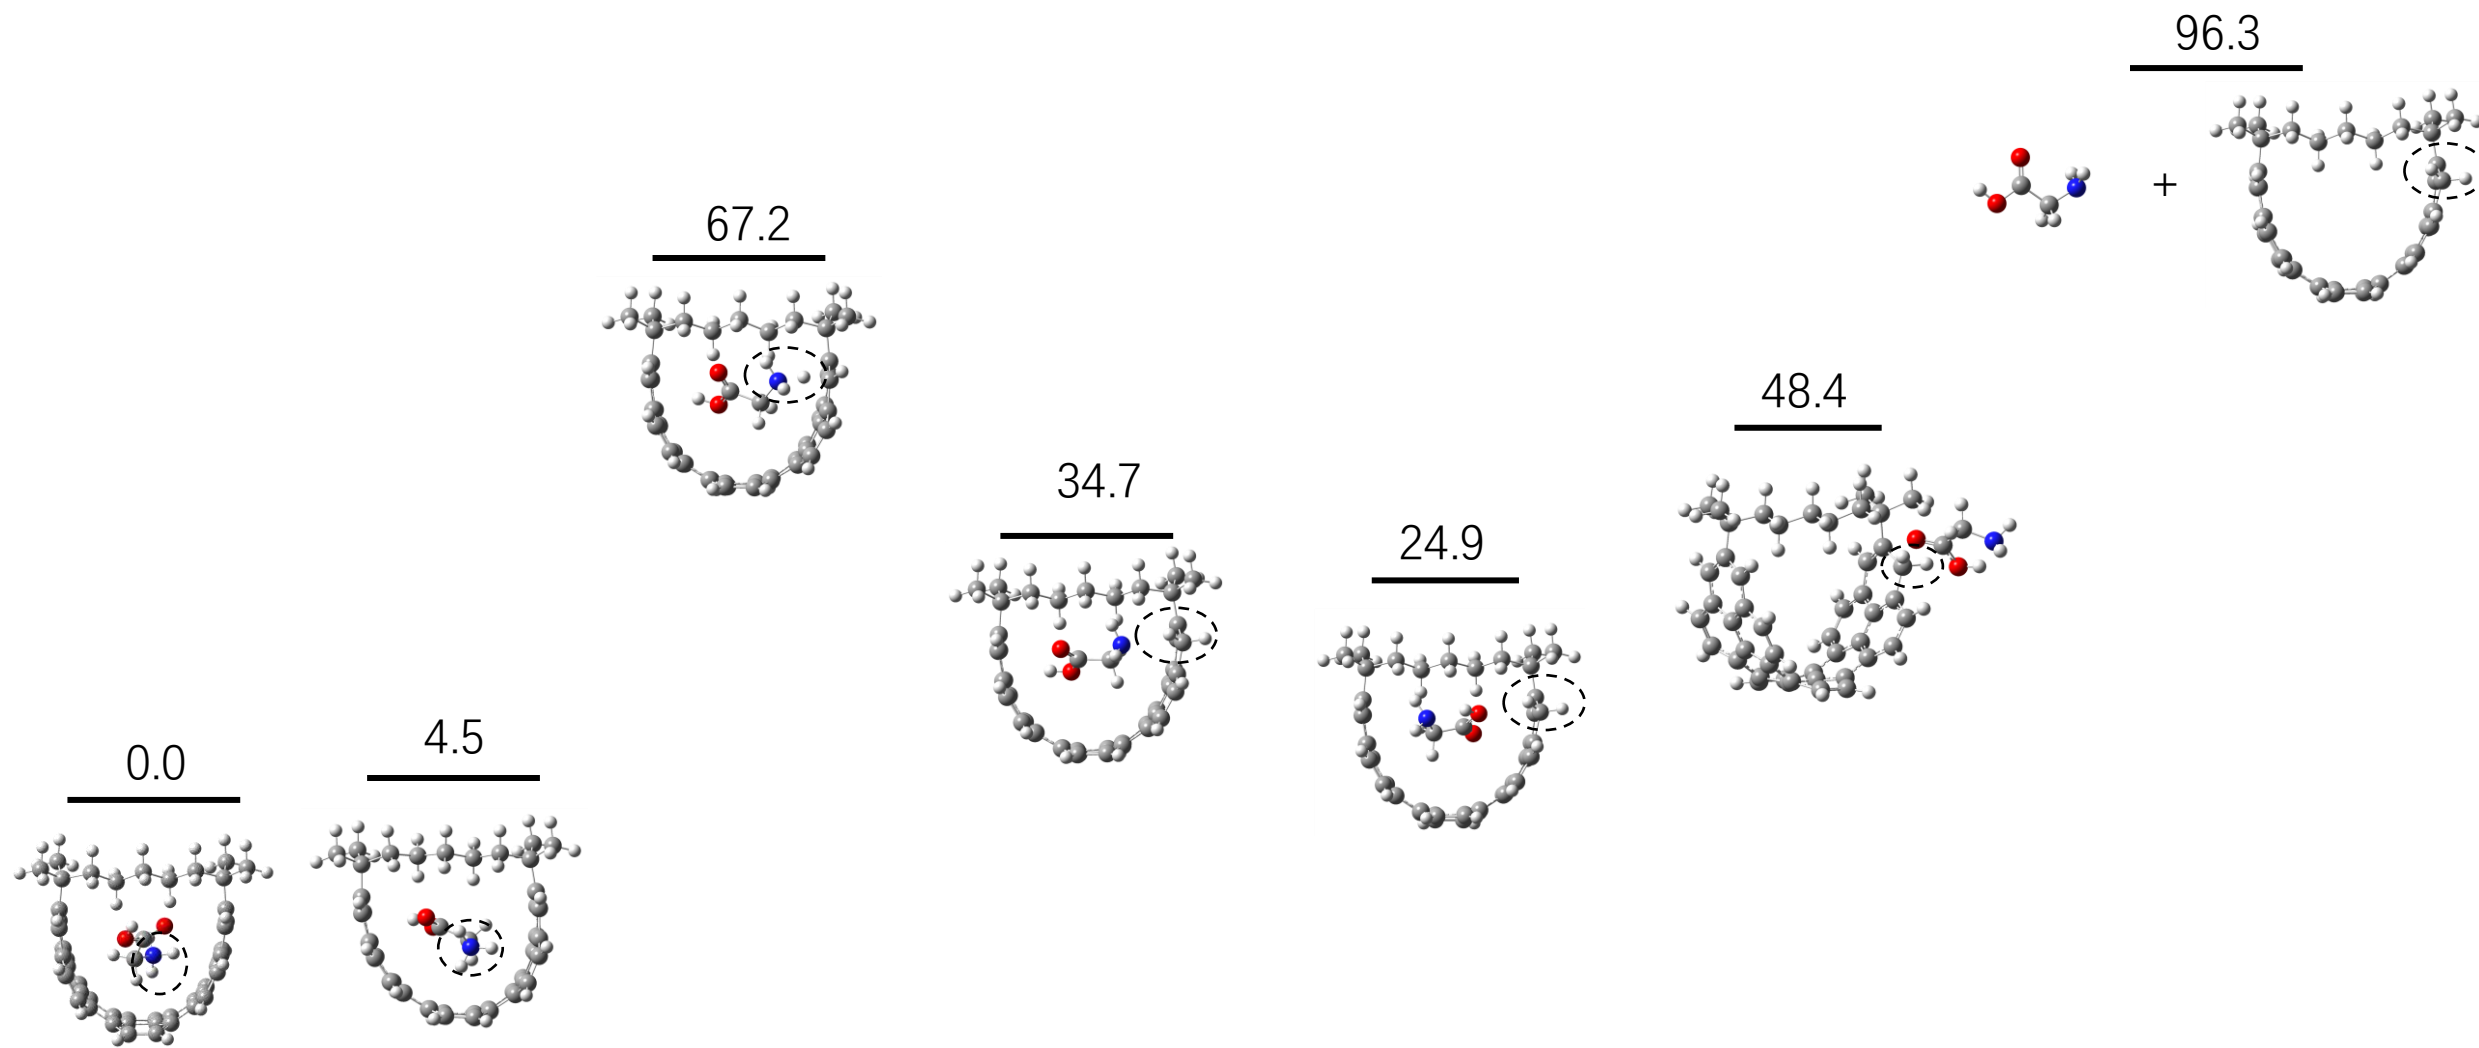

**Figure S6.** A possible dissociation pathway for *endo*-(TM7TP)(GlyH<sup>+</sup>) at the level of B3LYP-D3/6-31+G(d,p) at 298K<sub>17</sub> 1 atm. Black dashed line circles the protonation site.

Energy kJ/mol

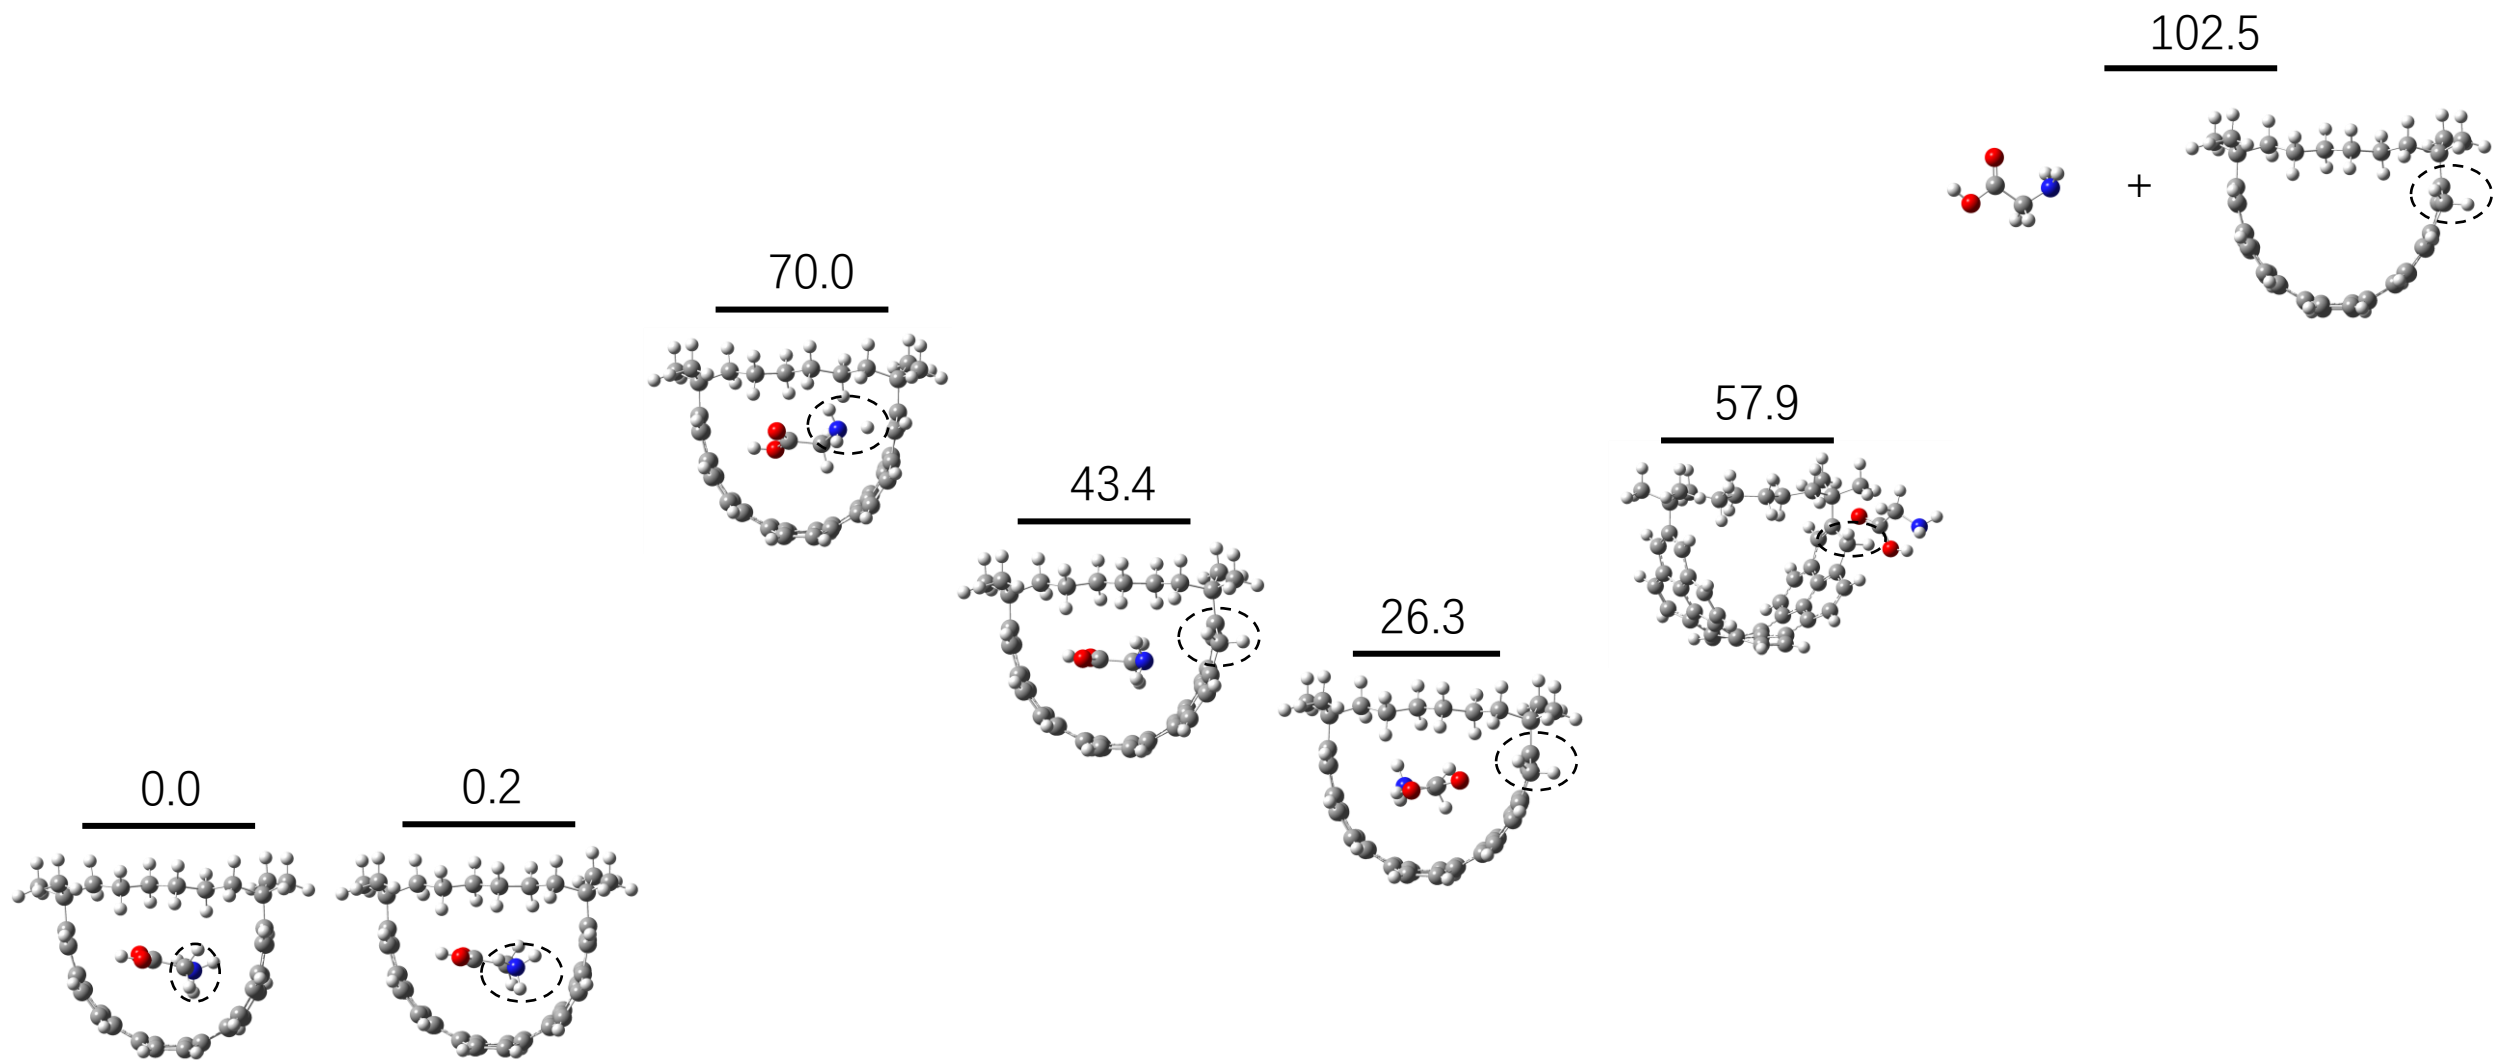

**Figure S7.** A possible dissociation pathway for *endo*-(TM8TP)(GlyH<sup>+</sup>) at the level of B3LYP-D3/6-31+G(d,p) at 298K, 1 atm. Black dashed line circles the protonation site.

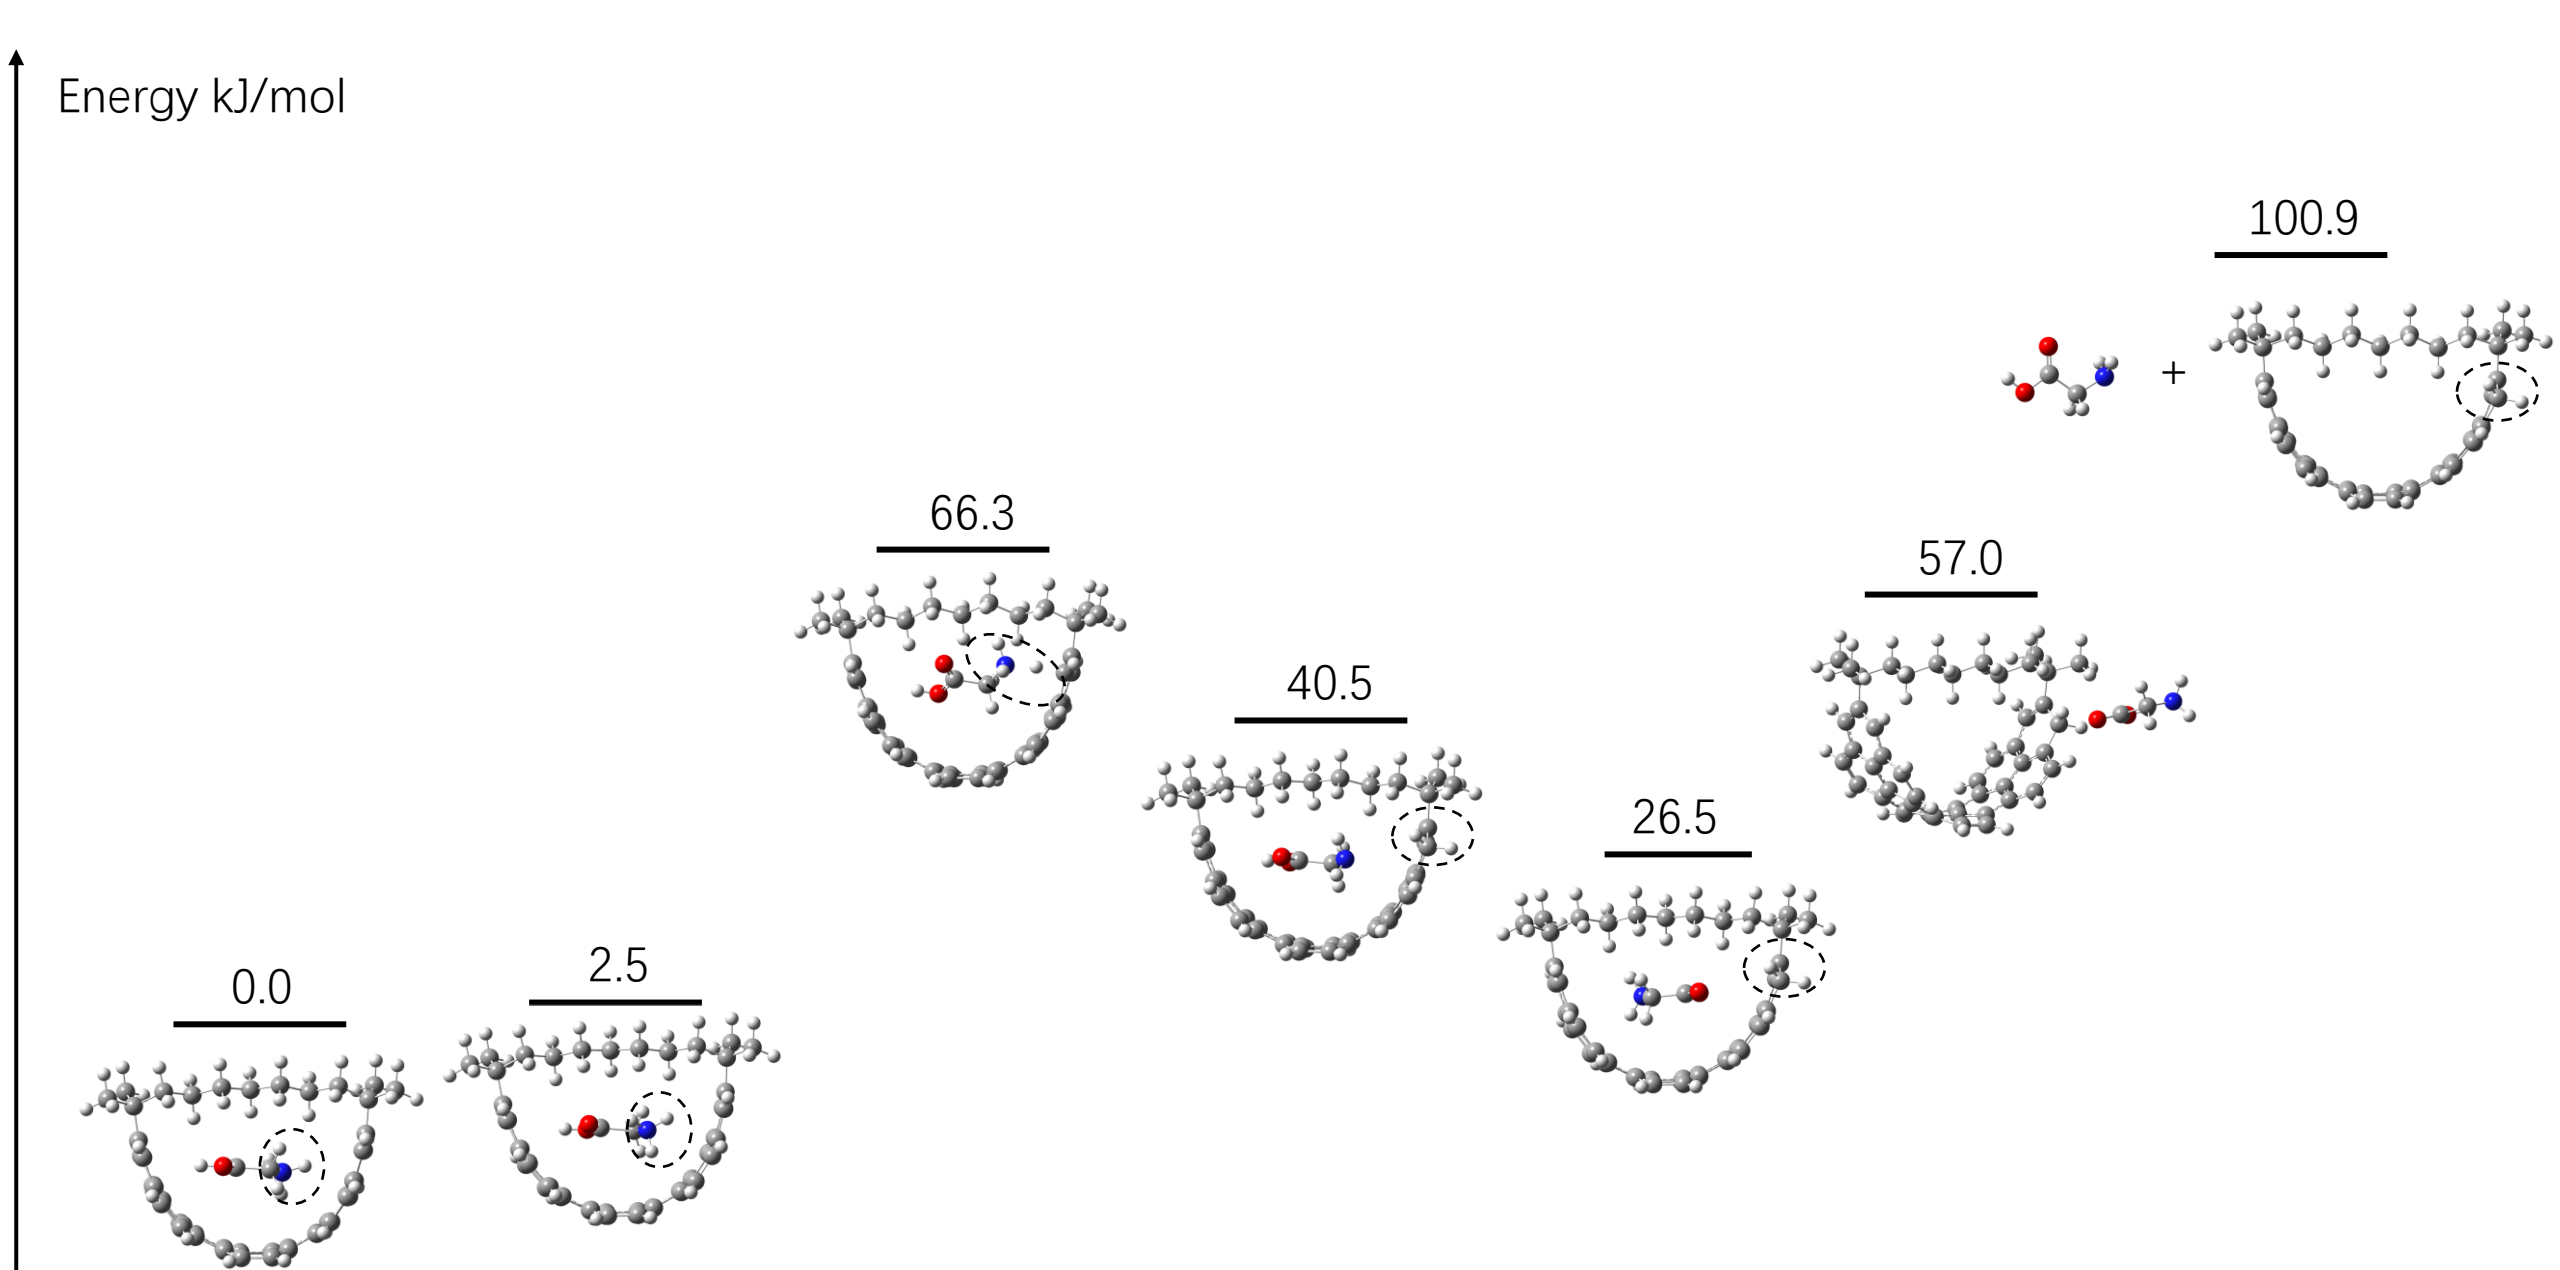

**Figure S8.** A possible dissociation pathway for *endo*-(TM9TP)(GlyH<sup>+</sup>) at the level of B3LYP-D3/6-31+G(d,p) at 298K<sub>19</sub> atm. Black dashed line circles the protonation site.

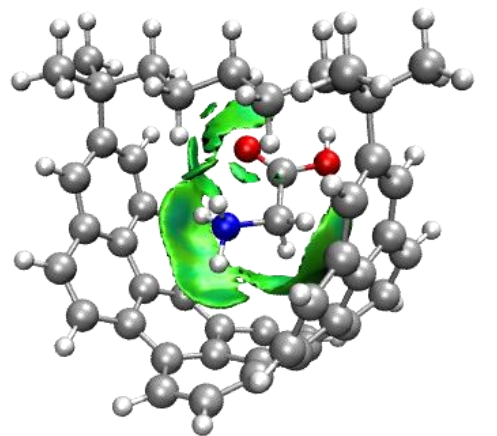

*endo*-(GlyH<sup>+</sup>)(TM7TP)

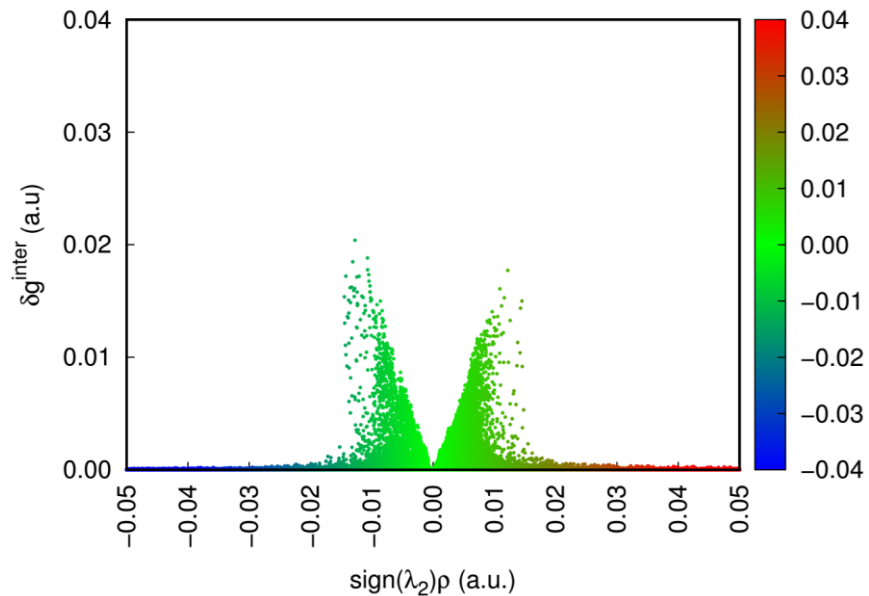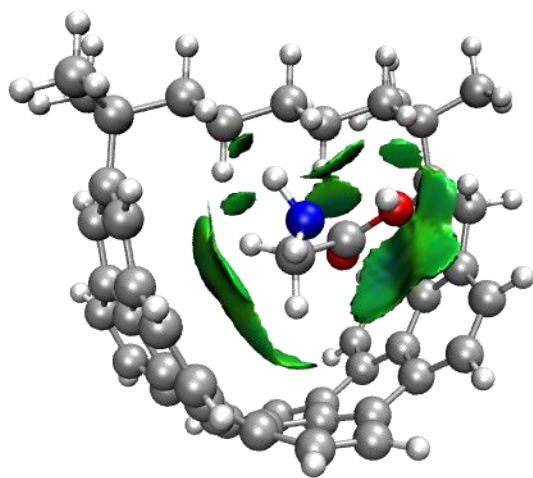

*endo*-(Gly)[(TM7TP)H<sup>+</sup>]

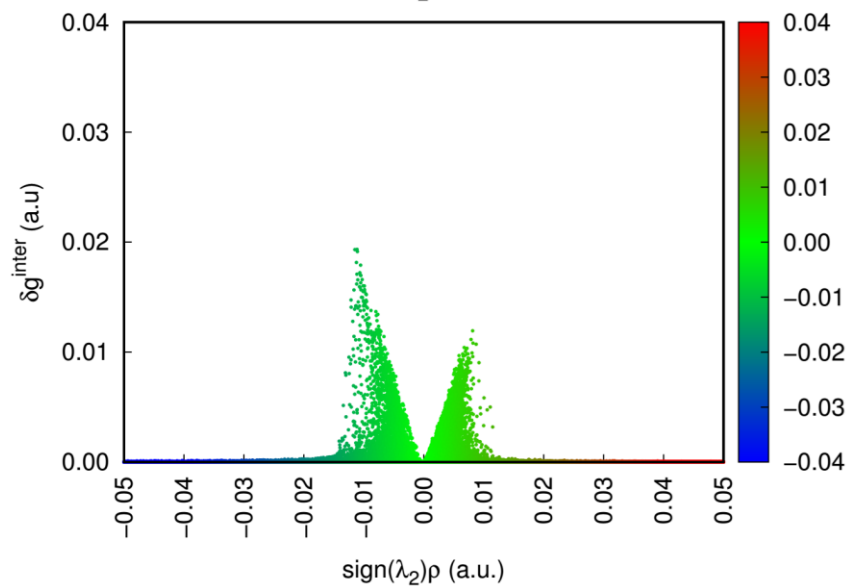

**Figure S9.** IGMH analysis of the lowest energy structures of each type of [(TM7TP)(Gly)]H<sup>+</sup> complexes. Upper figures are three dimensional isosurfaces (isovalue = 0.005 a.u.), lower figures are IGMH scatter plots. Both are colored according BGR scheme over the range of  $-0.04 < \text{sign}(\lambda_2)\rho < 0.04$  a.u., where the color blue, green and red correspond to strong attraction, weak attraction, and strong repulsion respectively.



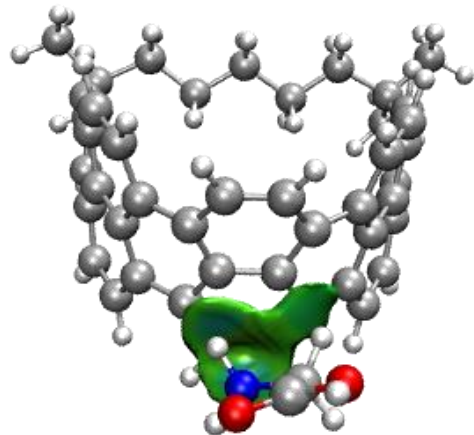

*exo*-(GlyH<sup>+</sup>)(TM7TP)

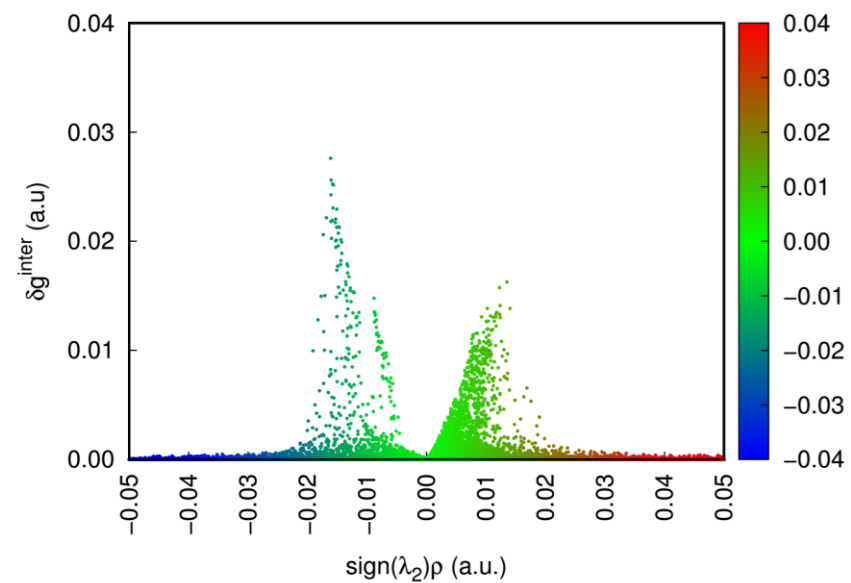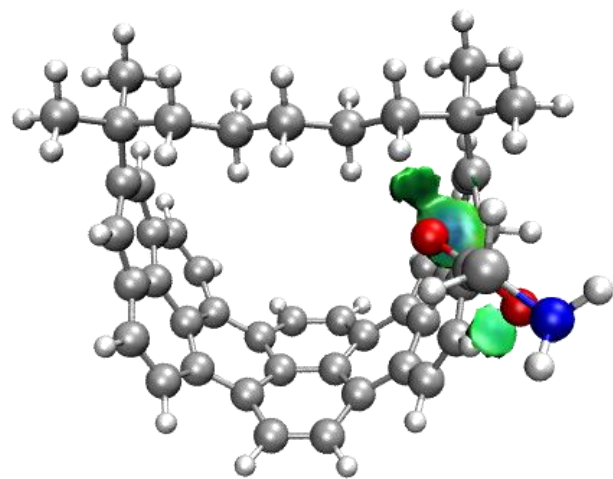

*exo*-(Gly)[(TM7TP)H<sup>+</sup>]

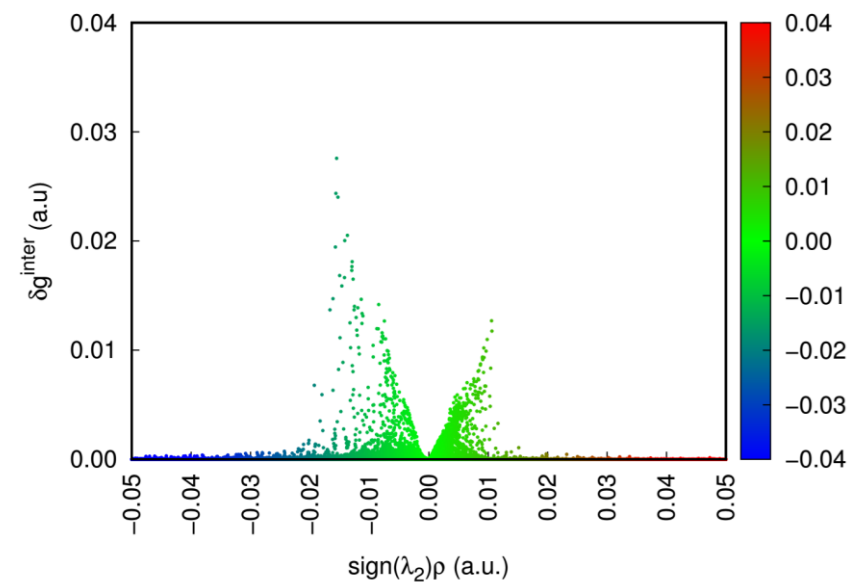

**Figure S9. continued**

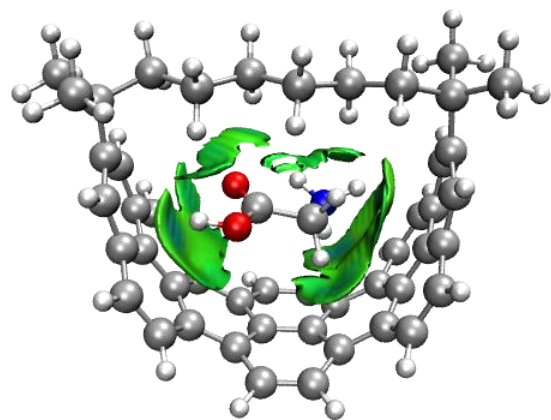

*endo*-(GlyH<sup>+</sup>)(TM8TP)

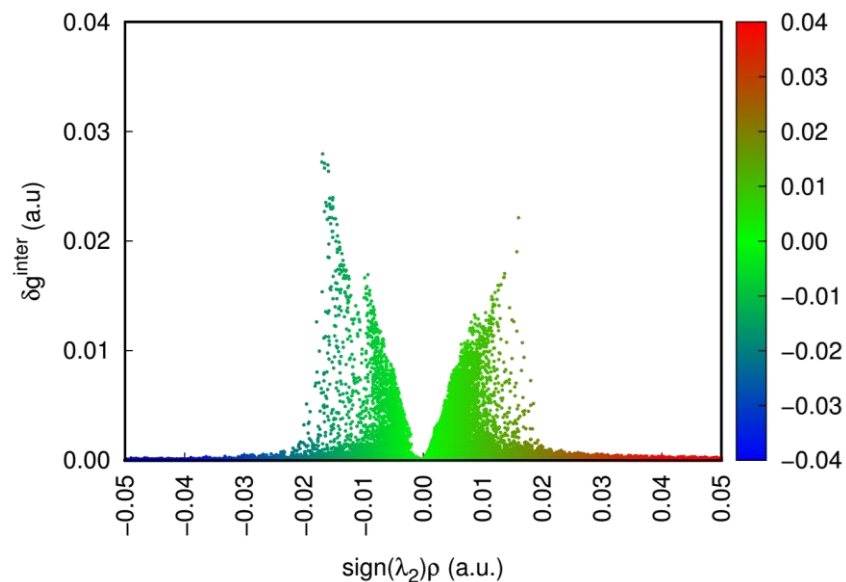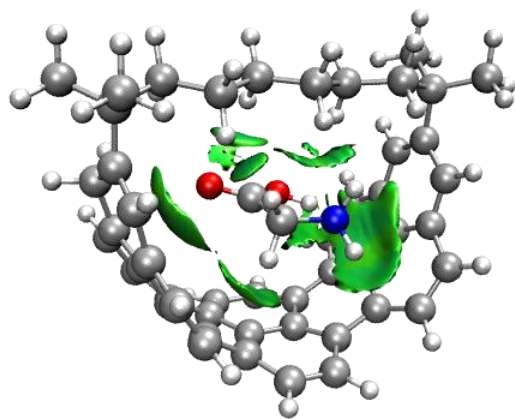

*endo*-(Gly)[(TM8TP)H<sup>+</sup>]

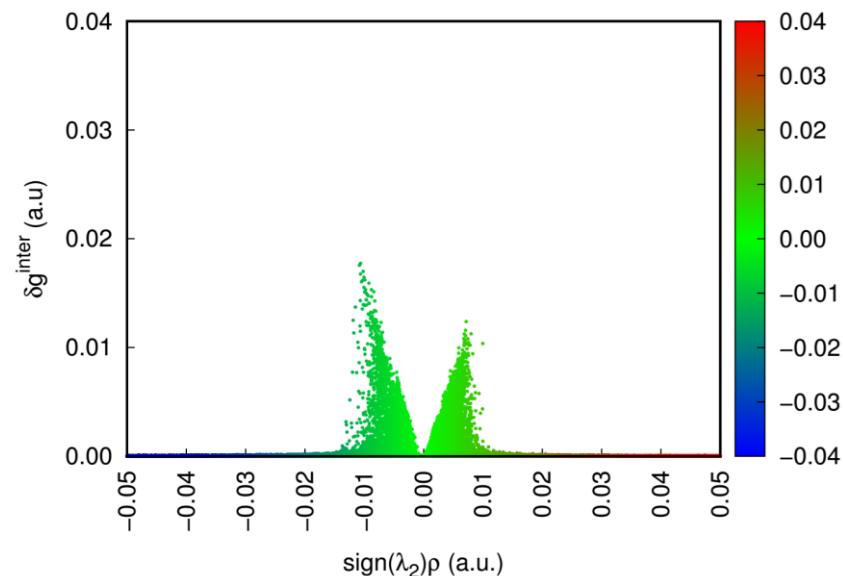

**Figure S10.** IGMH analysis of the lowest energy structures of each type of [(TM8TP)(Gly)]H<sup>+</sup> complexes. Upper figures are three dimensional isosurfaces (isovalue = 0.005 a.u.), lower figures are IGMH scatter plots. Both are colored according BGR scheme over the range of  $-0.04 < \text{sign}(\lambda_2)\rho < 0.04$  a.u., where the color blue, green and red correspond to strong attraction, weak attraction, and strong repulsion respectively.

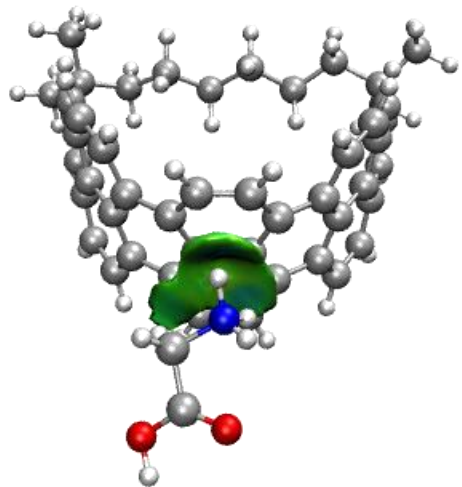

*exo*-(GlyH<sup>+</sup>)(TM8TP)

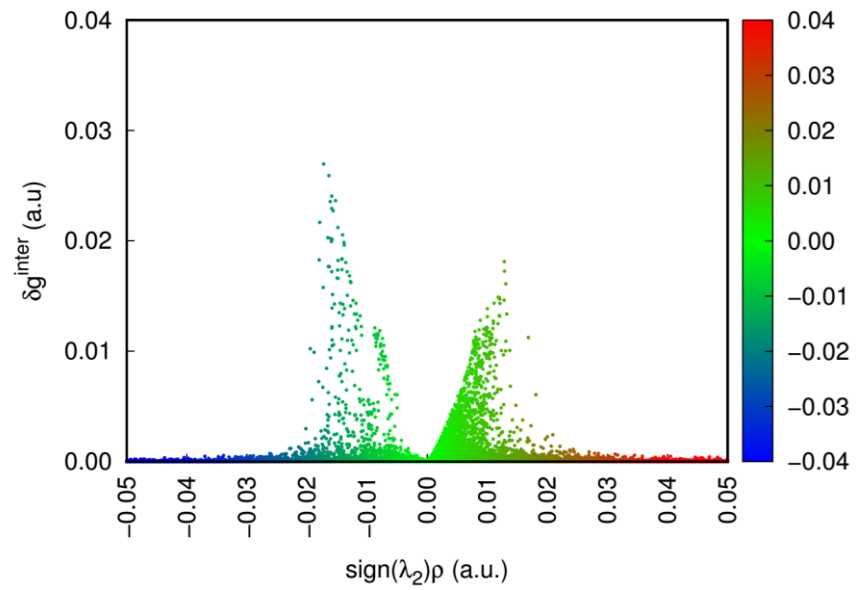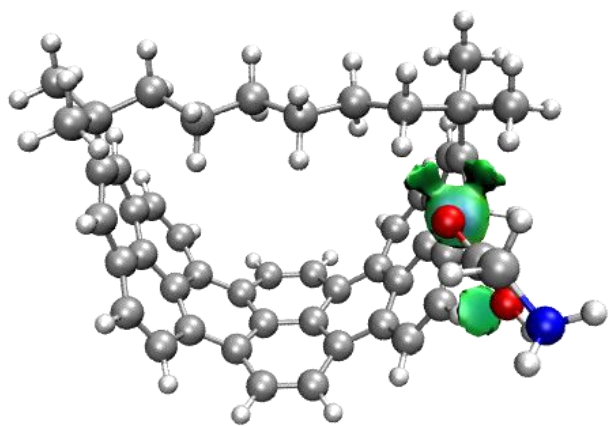

*exo*-(Gly)[(TM8TP)H<sup>+</sup>]

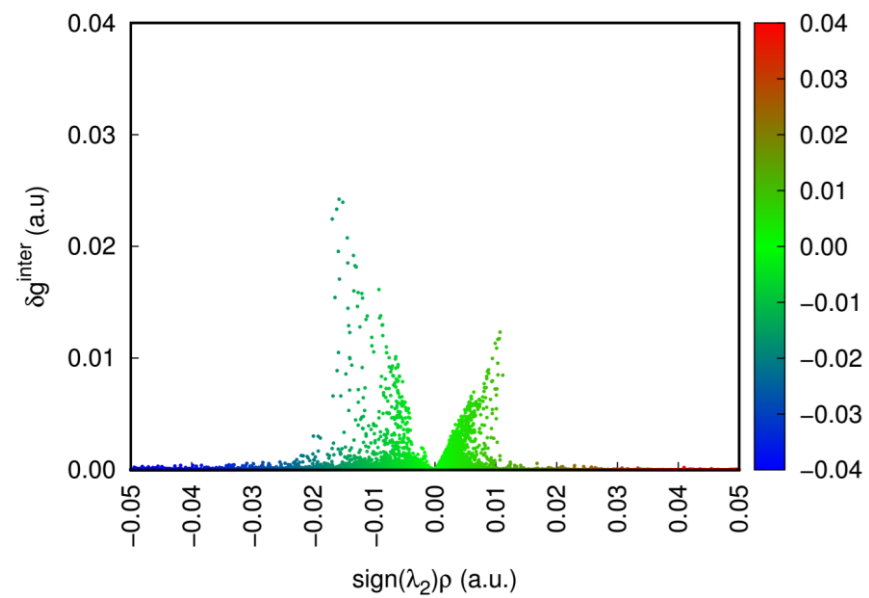

**Figure S10. continued**
